# **Olfactory-driven beta band entrainment of limbic circuitry during neonatal development**

Johanna K. Kostka & Ileana L. Hanganu-Opatz

*Institute of Developmental Neurophysiology, Center for Molecular Neurobiology,  
University Medical Center Hamburg-Eppendorf, 20251 Hamburg, Germany*

Corresponding authors: Ileana L. Hanganu-Opatz  
hangop@zmnh.uni-hamburg.de

Johanna K. Kostka  
johanna.kostka@zmnh.uni-hamburg.de

Figures: 6  
Supplementary Material: 5 figures, 12 tables  
Number of pages: 35

Number of words in Abstract: 156  
Number of words in Introduction: 670  
Number of words in Discussion: 1220

## **ABSTRACT**

Cognitive processing relies on the functional refinement of the limbic circuitry during the first two weeks of life. During this developmental period, when most sensory systems are still immature, the sense of olfaction acts as “door to the world”, providing the main source of environmental inputs. However, it is unknown whether early olfactory processing shapes the development of the limbic circuitry. Here, we address this question by combining simultaneous *in vivo* recordings from the olfactory bulb (OB), lateral entorhinal cortex (LEC), hippocampus (HP), and prefrontal cortex (PFC) with opto- and chemogenetic manipulations of mitral/tufted cells (M/TCs) in the OB of non-anesthetized neonatal mice. We show that the neonatal OB synchronizes the limbic circuitry in beta frequency range. Moreover, it drives neuronal and network activity in LEC, as well as subsequently, HP and PFC via long-range projections from mitral cells (MCs) to HP-projecting LEC neurons. Thus, OB activity controls the communications within limbic circuits during neonatal development.

## 1 INTRODUCTION

2 Coordinated neuronal activity during early development refines the neural circuits that account  
3 for complex processing in the adult brain. During the first two postnatal weeks, when rodents  
4 are still blind, deaf, and perform no active whisking, coordinated activity patterns in the sensory  
5 periphery occur independently of sensory input (Hanganu-Opatz, 2010; Leighton and  
6 Lohmann, 2016). Spontaneous neuronal discharges in the retina, cochlea, and whisker pad  
7 trigger discontinuous oscillatory bursts in the corresponding primary sensory cortices (Ackman  
8 et al., 2012; Hanganu et al., 2006; Khazipov et al., 2004; Mizuno et al., 2014; Wang and  
9 Bergles, 2015) that are necessary for the development of sensory discrimination (Che et al.,  
10 2018). Similar activity patterns can also be observed in brain areas involved in higher cognitive  
11 processing. Discontinuous theta band oscillations in the LEC entrain similar activity patterns in  
12 the HP, which in turn entrains the prelimbic area (PL) of the PFC (Ahlbeck et al., 2018;  
13 Bitzenhofer et al., 2017b; Brockmann et al., 2011; Hartung et al., 2016a). Disturbance of these  
14 early activity patterns in mouse models of psychiatric risk (Chini et al., 2020; Domnick et al.,  
15 2015; Hartung et al., 2016b; Richter et al., 2019; Xu et al., 2021) as well as through  
16 pharmacological (Krüger et al., 2012) or optogenetic manipulations (Bitzenhofer et al., 2021)  
17 led to disruption of adult circuits and behavioral abilities. However, it is not clear whether  
18 stimulus-independent activity patterns in the sensory periphery impact the development of  
19 limbic networks.

20 Due to the limited or absent functionality of most sensory systems during the first two  
21 postnatal weeks, their contribution to the development of limbic networks has been considered  
22 negligible. This hypothesis has been supported by data showing that the synchrony between  
23 V1 and the HP-PFC network before eye-opening is rather weak (Brockmann et al., 2011). In  
24 contrast to other sensory systems, the olfactory system is functional early in life and newborn  
25 mice heavily depend on it for survival (Logan et al., 2012). Correspondingly, the anatomical  
26 pathways from OB to cortical areas are unique among sensory systems. MCs send afferents  
27 to the piriform cortex (PiR) and limbic brain areas such as LEC and amygdala, lacking the relay  
28 through the thalamus (Igarashi et al., 2012; Luskin and Price, 1983). At adult age, in line with  
29 the anatomical connectivity, strong functional coupling during odor processing has been found  
30 between OB and these brain areas. For example, adult olfactory processing relies on  
31 respiration-modulated beta and gamma OB activity (Kay, 2014; Neville and Haberly, 2003).  
32 Further, beta oscillations in PiR, LEC, and HP play a critical role in olfactory memory  
33 processing (Gourévitch et al., 2010; Vanderwolf and Zibrowski, 2001; Xu and Wilson, 2012).  
34 Moreover, synchronized beta oscillations between OB-HP and LEC-HP are critically involved  
35 in odor learning (Igarashi et al., 2014; Martin et al., 2007, 2006; Ravel et al., 2003). Recently,  
36 beta oscillations in prefrontal-hippocampal networks have been identified to support the  
37 utilization of odor cues for memory-guided decision making (Symanski et al., 2021).

38           The tight and behaviorally relevant coupling between OB and limbic circuits at adult age  
39 leads to the question, which role does olfactory activation early in life play for these circuits.  
40 Previously, we showed that discontinuous oscillatory activity in the theta-beta range, emerging  
41 as a result of bursting MCs in the neonatal OB, entrains similar oscillatory patterns in LEC  
42 (Gretenkord et al., 2019; Kostka et al., 2020). However, the role of neuronal and network  
43 activity in the OB for the functional development of downstream areas within limbic circuits is  
44 still largely unknown.

45           To address this knowledge gap, we simultaneously monitored single-unit activity (SUA)  
46 and local field potentials (LFP) in OB, LEC, HP, and PFC of non-anesthetized neonatal mice  
47 (postnatal day (P) 8-10) during manipulation of M/TC activity using excitatory opsins and  
48 inhibitory DREADDs. We show that activation of M/TCs triggers action potential firing in LEC  
49 and HP as well as prominent beta oscillations that synchronize the OB with the downstream  
50 cortical areas. These data document the ability of coordinated activity at the sensory periphery  
51 to shape the development of circuits accounting for cognitive processing.

52

## 53 **RESULTS**

### 54 **Oscillatory activity in OB times the network activity in limbic circuits of neonatal mice**

55 To get first insights into the impact of OB activity on developing cortical circuits including LEC,  
56 HP, and PFC, we simultaneously recorded the LFP and multiunit activity (MUA) in all four brain  
57 areas in non-anesthetized neonatal (P8-10) mice (n=56, Figure 1A, B) and assessed the  
58 temporal relationships between network oscillations and neuronal firing. All investigated areas  
59 showed discontinuous oscillatory activity in theta-beta range (Brockmann et al., 2011;  
60 Gretenkord et al., 2019; Hartung et al., 2016a), accompanied by continuous low amplitude slow  
61 frequency oscillations peaking at 2-4 Hz (respiration rhythm, RR) (Figure 1B). Half (med:  
62 53.779 %, iqr: 47.681 – 65.104 %, n=20) of the oscillatory events detected in OB co-occurred  
63 in all four brain regions. To quantify the coupling of OB to cortical areas, we calculated the  
64 imaginary coherence (Figure 1C). While a high level of synchrony linked OB with all  
65 investigated cortical areas, the strength of coupling was frequency-dependent, having the  
66 highest magnitude in the beta frequency range for OB-LEC and OB-HP and in the RR  
67 frequency band for OB-LEC and OB-PFC.

68           To uncover whether OB activity times the neuronal firing of cortical areas, we calculated  
69 the phase-locking of single units (SUA) recorded in OB, LEC, HP, and PFC to beta band  
70 oscillations (12-30 Hz) in OB (Figure 1D). Significantly locked OB units fired shortly before the  
71 trough of the beta cycle, while LEC and HP units were locked to significantly shifted phase  
72 angles (Figure 1D, Table S1, 2). Solely the prefrontal firing showed no phase preference of  
73 locking to the oscillatory phase in OB. Next, we questioned whether the communication

74 between OB and cortical areas is directed and whether OB acts as a driving force within the  
75 circuit. For this, we assessed the temporal relationship between the firing in cortical regions  
76 and OB by calculating the standardized cross-covariance of unit pairs (Siapas et al., 2005).  
77 For unit pairs between OB and LEC, OB and HP, and OB and PFC, the peak of cross-  
78 covariance was at negative time-lags, indicating that spiking in OB preceded cortical firing  
79 (Figure 1E). Monitoring the timing of interactions between cortical areas (LEC-HP, LEC-PFC,  
80 and HP-PFC) confirmed the previously reported directionality of communication (Hartung et  
81 al., 2016a), yet less clear as for the OB-driven coupling. As spike-dependent methods are  
82 strongly biased by the firing rate of investigated neurons, which is rather low in neonatal mice,  
83 we next used the spectral dependency ratio (SDR), a method that infers causal direction from  
84 time-series data (Ramirez-Villegas et al., 2021; Shajarisales et al., 2015), to confirm the  
85 directed communication between OB and cortical areas. SDR values for OB → LEC were  
86 significantly higher than for LEC → OB, supporting the drive from OB to LEC. Further, the SDR  
87 analysis revealed a spectral dependency of HP as well as PFC on OB, suggesting the  
88 contribution of OB activity to the oscillatory entrainment of prefrontal and hippocampal circuits  
89 (Figure 1F, Table S3). Moreover, the analysis confirmed the previously reported directed  
90 interaction from HP to PFC and LEC to PFC (Brockmann et al., 2011; Hartung et al., 2016a).  
91 No SDR difference was detected for LEC-HP, indicating that, in line with anatomical data  
92 (Hartung et al., 2016a), a bidirectional coupling links HP and LEC (Figure 1F, Table S3).

93 Thus, tight directed interactions between OB and cortical areas ensure timed firing and  
94 oscillatory entrainment within downstream LEC-HP circuits.

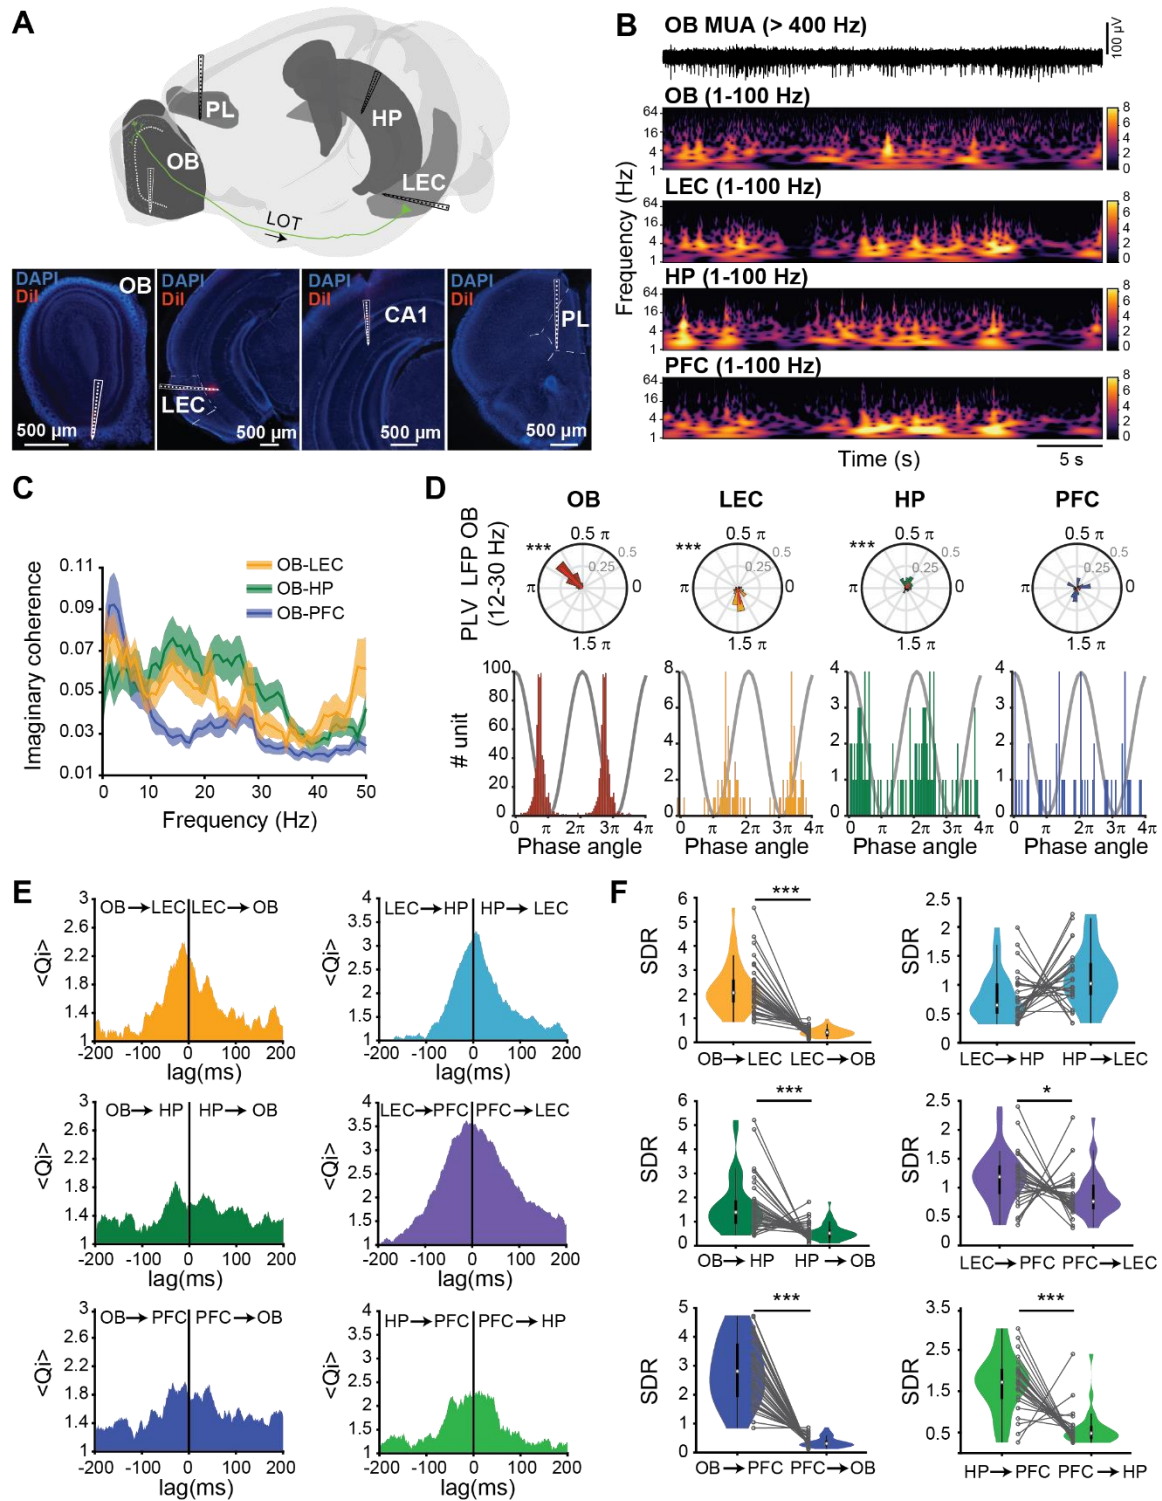

Figure 1: Functional coupling between neonatal OB, LEC, HP, and PFC

### Figure 1: Functional coupling between neonatal OB, LEC, HP, and PFC

A. Top, schematic of recording configuration for simultaneous extracellular recordings in OB, LEC, HP, and PFC. The positions of recording sites were displayed superimposed on the corresponding brain areas (Brainrender, Claudi et al., 2020). Bottom, digital photomontages displaying the Dil-labeled (red) electrode tracks in DAPI (blue) stained slices of OB, LEC, HP, and PL of a P10 mouse.

B. Representative MUA trace recorded in the mitral cell layer (MCL) displayed together with the wavelet spectra of LFP recorded simultaneously in OB, LEC, HP, and PFC.

C. Spectra of imaginary coherence calculated for OB - LEC (yellow), OB - HP (green), and OB - PFC (blue).

D. Top, polar plots displaying the phase-locking of significantly locked units in OB (red), LEC (yellow), HP (green), and PFC (blue) to beta oscillations in OB. Bottom, histograms of mean phase angle for significantly phase-locked OB (red), LEC (yellow), HP (green), and PFC (blue) units. Histograms are replicated over two OB beta cycles (gray curve). (Rayleigh test for non-uniformity, \*\*\*  $p < 0.001$ )

E. Plots of standardized mean spike-spike cross-covariance for OB - LEC (yellow), OB - HP (green), OB - PFC (blue), LEC - HP (light blue), LEC - PFC (purple), and HP - LEC (light green). Negative lags indicate that spiking in the first brain area precedes spiking in the second brain area.

F. Spectral dependency ratio (SDR) calculated for OB - LEC (yellow), OB - HP (green), OB - PFC (blue), LEC - HP (light blue), LEC - PFC (purple), and HP - LEC (light green). Gray dots and lines correspond to individual animals. (\*  $p < 0.05$ , \*\*  $p < 0.01$ , \*\*\*  $p < 0.001$ , Wilcoxon signed-rank test).

### 95 **Activation of M/TCs induces beta oscillations in neonatal OB**

96 To elucidate the mechanisms of directed communication between OB and downstream cortical  
97 areas, we activated ChR2-transfected M/TCs by light and simultaneously monitored the  
98 network and neuronal activity in neonatal LEC, HP, and PFC. Transfection of M/TCs was  
99 achieved using a cre-dependent virus vector (AAV9-Ef1a-DIO-hChR2(E123T/T159C)-EYFP)  
100 that was injected into the right OB of P1 Tbet-cre mice (Figure 2A). ChR2-EYFP expression  
101 was reliably detected in M/TCs and their projections 7 days after injection (Figure 2B). Ramp  
102 light stimuli of increasing intensity (473 nm, total duration 3 s) were used to activate M/TCs in  
103 the OB of P8-10 mice (Figure 2A). The stimulation parameters have been set in line with  
104 previous data (Bitzenhofer et al., 2017a) to prevent not only firing as a result of tissue heating  
105 but also artificially synchronous firing patterns and large stimulation artifacts. Ramp stimulation  
106 led to a sustained increase of spike discharge and broad-band (4-100 Hz) LFP power  
107 augmentation in OB that peaked in beta frequency range (12-30 Hz) (Figure 2C, D, S1A). In  
108 cre<sup>+</sup> mice, the modulation indices (MI) for theta, beta, and gamma power were significantly  
109 increased and different from those calculated for cre<sup>-</sup> animals (Figure 2Dii, Table S5).  
110 Correspondingly, SUA strongly augmented during ramp stimulation (Figure 2E, F). This  
111 activation was not layer-specific and, mirroring the tight OB wiring, not only M/TCs but also  
112 granule cells (GCs) and other OB interneurons increased their firing in response to light  
113 activation of ChR2-transfected M/TCs (Figure S1B, C). Analysis of the firing onset along OB  
114 layers confirmed the global activation. Cells in the MCL and GCL started to fire immediately

115 after the 3 ms-long light pulses, whereas cells in the extra plexiform layer (EPL) and glomerular  
116 layer (GL) responded with a brief delay (Figure 2G).

117 To assess the temporal relationship between neuronal firing and beta oscillations in  
118 OB, we calculated the locking of SUA firing to the oscillatory phase before (Pre) and during  
119 (Stim) light stimulation. Ramp stimulation caused a significantly stronger locking of OB units to  
120 beta oscillations (Pre: med: 0.147, iqr: 0.094 – 0.227; Stim: med: 0.180, iqr: 0.103 – 0.294,  
121  $n_{\text{units}}=176$  from 26 mice,  $p=9.39 \times 10^{-5}$ , LMEM) (Figure 2Hi) and an augmentation of the  
122 proportion of significantly phase-locked units to the beta rhythm during ramp stimulation (Pre:  
123 16.478 %, 29/176 units, Stim: 55.114 %, 97/176 units,  $p=3.12 \times 10^{-14}$ , Fisher's exact test) (Figure  
124 2Hii). Of note, the coupling of OB units to the RR phase was weaker (Pre: med: 0.129, iqr:  
125 0.080 – 0.220, Stim: med: 0.097, iqr: 0.057 – 0.157,  $n_{\text{units}}=176$  from 26 mice,  $p=7.782 \times 10^{-6}$ ,  
126 LMEM) (Figure S1D) even though the proportion of locked units (Pre: 14.773 %, 26/176 units,  
127 Stim: 14.205 %, 25/176 units,  $p=1$ , Fisher's exact test) and the power of RR oscillations were  
128 not altered upon light stimulation (Figure S1D(iii), 2D). In contrast, light stimulation had no  
129 effects on the phase-locking of OB units to oscillatory phase in *cre* mice (Figure S1E, Table  
130 S4). The larger beta power observed during ramp stimulation might result from increased M/TC  
131 and interneuronal firing, since spike-triggered power (STP) analysis revealed that the ability of  
132 OB units to trigger beta power is stronger during ramp stimulation compared to baseline  
133 periods (Pre: med: 6.694  $\mu\text{V}^2$ , iqr: 2.291 – 16.447  $\mu\text{V}^2$ ; Stim: med: 18.285  $\mu\text{V}^2$ , iqr: 4.437 –  
134 58.407  $\mu\text{V}^2$ ;  $n_{\text{units}} = 309$  from 19 mice,  $p = 3.16 \times 10^{-13}$ , LMEM) (Figure 2I).

135 These data indicate that the activation of M/TCs recruits the local circuitry in the OB  
136 and thereby organizes the OB network activity in the beta rhythm.



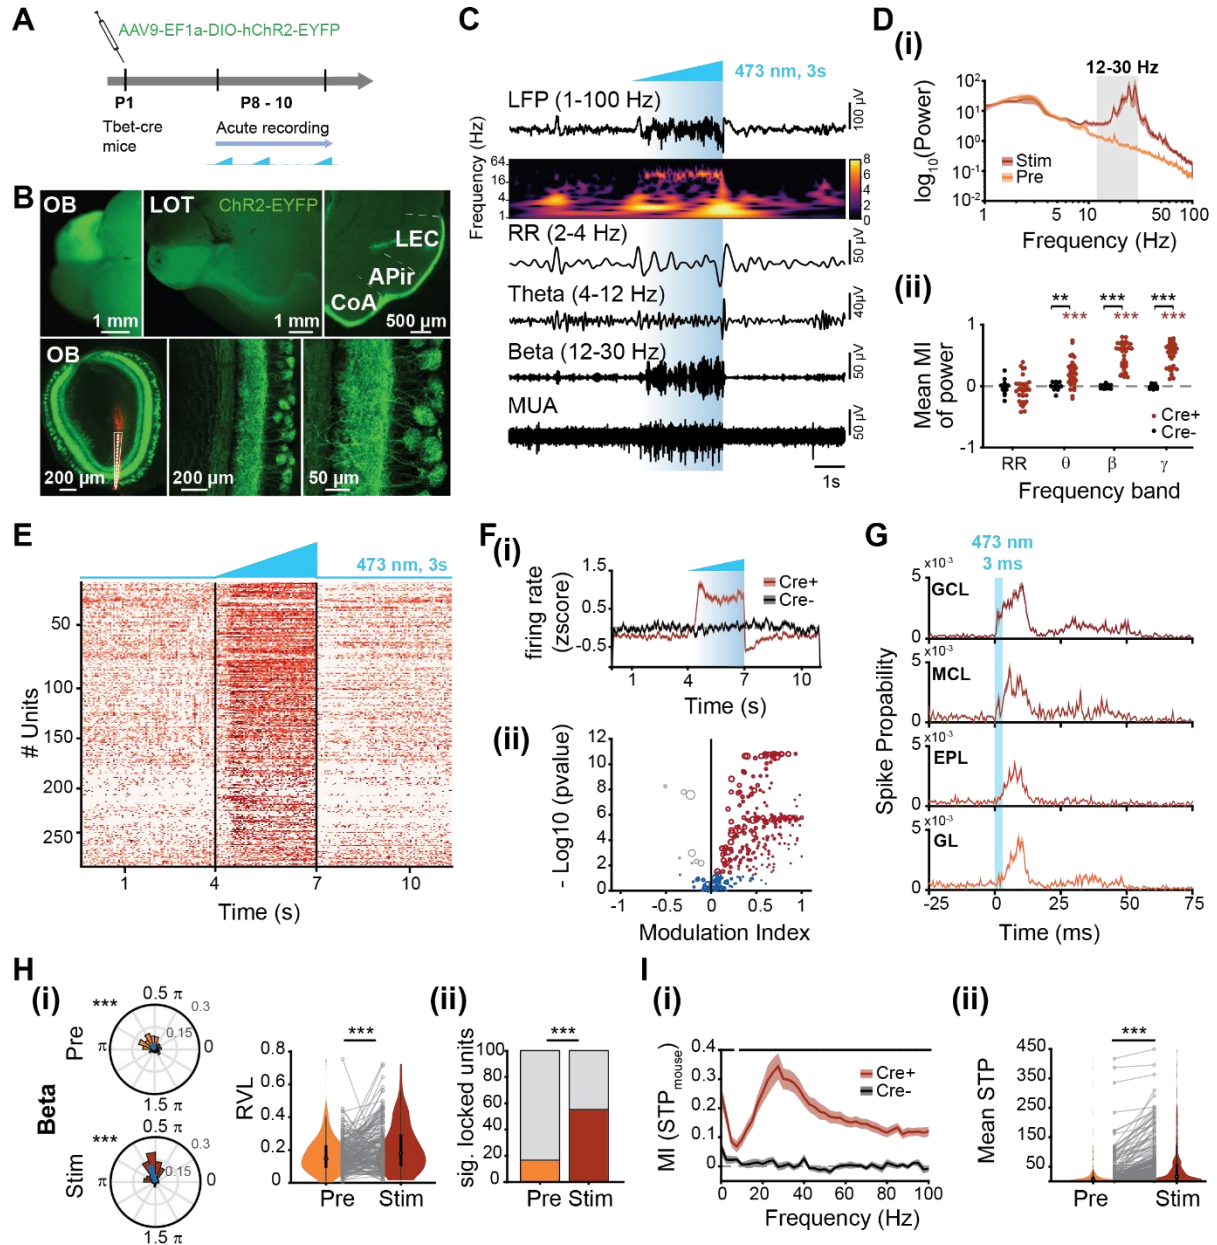

**Figure 2: Effects of M/TC manipulation by light on single-unit entrainment and oscillatory activity in OB.**

**Figure 2: Effects of M/TC manipulation by light on single-unit entrainment and oscillatory activity in OB.**

A. Schematic of the experimental protocol.

B. Top, photograph of the dorsal (left) and ventral side (middle) of a brain from a Tbet-cre<sup>+</sup> mouse showing EYFP expression in the OB and M/TC axonal projections (LOT) to LEC, piriform transition area (APir), and cortical amygdala (CoA) (right). Bottom, digital photomontages displaying the Dil labeled electrode track in OB (left) and confocal images displaying the mitral cell layer (MCL) of the right OB at different magnifications (middle and right).

C. Representative extracellularly recorded LFP in the OB displayed band-pass filtered in different frequency bands and accompanied by the corresponding wavelet spectrum during ramp stimulation, as well as by the simultaneously recorded MUA in the MCL.

D. (i) Power spectrum for OB LFP before (orange) and during (red) ramp stimulation. The gray shaded area corresponds to the beta band (12-30 Hz). (ii) Mean MI of LFP power in different frequency bands for cre<sup>+</sup> (red) and cre<sup>-</sup> (black) mice. (red stars for cre<sup>+</sup>: \*\*\* p < 0.001, Wilcoxon signed-rank test; black stars for comparison cre<sup>+</sup> vs. cre<sup>-</sup>: \*\* p < 0.01, \*\*\* p < 0.001, Wilcoxon rank-sum test)

E. Raster plot of SUA in the OB before, during, and after ramp stimulation.

F. (i) Z-scored firing rate in response to ramp stimulation of units recorded in the OB of cre<sup>+</sup> (red) and cre<sup>-</sup> (black) mice. (ii) MI of SUA firing in response to ramp stimulation (Significantly activated units are shown in red, whereas significantly inhibited units in gray, p < 0.01, Wilcoxon signed-rank test).

G. Spiking probability of units located in the granule cell layer (GCL), MCL, external plexiform layer (EPL), and glomerular layer (GL) after a 3 ms light pulse (blue box, 473 nm) delivered to the OB.

H. (i) Phase locking of OB units to beta oscillations in OB. Left, polar plots displaying phase locking of OB units before (Pre, orange) and during ramp stimulation (Stim, red). The mean resulting vectors are shown as blue lines. (\*\*\* p < 0.001, Rayleigh test for non-uniformity). Right, violin plots displaying the resulting vector length (RVL) of OB units before (Pre, orange) and during ramp stimulation (Stim, red). Gray dots and lines correspond to individual units. (\*\*\* p < 0.001, linear mixed-effect model). (ii) Percentage of significantly locked units before (Pre, yellow) and during (Stim, red) stimulation. (\*\*\* p < 0.001, Fisher's exact test).

I. (i) Plot of mean MI of spike-triggered power (STP) for cre<sup>+</sup> (red) and cre<sup>-</sup> (black) mice during ramp stimulation. (black line: p < 0.05, Wilcoxon rank-sum test). (ii) Violin plots displaying mean STP for OB units before (Pre, yellow) and during ramp stimulation (Stim, red). Gray dots and lines correspond to individual units. (\*\*\* p < 0.001, linear mixed-effect model).

137 **M/TC activation drives neuronal firing in LEC and HP**

138 To characterize the downstream effects of beta band entrainment of OB, we firstly analyzed  
139 the organization of OB projections in neonatal mice. In line with morphological investigations  
140 in adult mice (Igarashi et al., 2021), we previously showed that MC axons are present in  
141 superficial layers of LEC already at neonatal age (Gretenkord et al., 2019). Entorhinal neurons  
142 in layer II/III strongly project to HP and weakly to PFC (Hartung et al., 2016a; Xu et al., 2021).  
143 Here, we performed axonal tracing of M/TCs using the anterograde virus (AAV9-hSyn-  
144 hChR2(H134R)-EYFP) injected into the OB at P8. Simultaneously, we monitored the entorhinal  
145 neurons that project to HP by using the retrograde virus (AAVrg-CamKIIa-mCherry) injected  
146 into the HP at P8 (Figure 3A, B). At P18, MC axons expressing EYFP were present in layer I/II  
147 of LEC and PiR (Figure 3B). Additionally, mCherry-expressing HP-projecting neurons were  
148 identified in entorhinal layer II/III. These neurons send their apical dendrites to layer I of LEC,  
149 where they collocate with MC axonal projections (Figure 3B).

150           Since these morphological data suggest that the OB interacts with downstream cortical  
151 areas, in a second step, we monitored the functional impact of direct OB projections on limbic  
152 circuits. For this, we used pulse (3 ms) and ramp (3 s) blue light stimulations (473 nm) of  
153 transfected OB neurons and simultaneously recorded the neuronal activity in LEC, HP, and  
154 PFC. Pulse stimulation of M/TCs induced neuronal firing in all investigated brain areas, except  
155 PFC (Figure 3Ci). While the light-evoked OB firing rate sharply peaked already 7-8 ms post-  
156 stimulus, the responses in the other brain areas were substantially broader and delayed (37  
157 ms in LEC, 45-60 ms in HP). A second firing increase was detected in OB after ~28 ms and  
158 might reflect OB-internal processing or feedback activation from downstream areas. To expand  
159 on these results, we used normalized cross-covariance analysis to uncover the temporal  
160 correlations between light-evoked spike trains in the investigated brain regions. The most  
161 prominent interaction was detected for OB-LEC, with OB firing preceding the entorhinal  
162 discharges (Figure 3Cii). While having a similar directionality, the OB-HP cross-covariance  
163 peaked later and less precisely. The data gives first insights into the communication pathways  
164 relaying the information from M/TCs to LEC and subsequently, to HP.

165           Ramp stimulation of M/TCs evoked neuronal firing in LEC, HP, and PFC with similar  
166 dynamics: a fast increase in OB followed by a delayed spiking in LEC, and subsequently in HP  
167 and PFC. In OB, SUA abruptly increased with ramp onset (76.157 % of units activated  
168 significantly, 2.847 % units inhibited significantly) and decreased post-stimulus (8.185 % of  
169 units activated significantly, 29.893 % of units inhibited significantly) (Figure 3Di, Ei). In  
170 contrast, the average SUA firing rate in LEC, HP, and PFC showed a delayed increase starting  
171 around halfway through the ramp and continuing after the light stimulation (Figure 3Dii-iv).  
172 Analysis of the proportion of activated units during and after ramp revealed that neurons in  
173 downstream areas expressed higher firing rates also after the light was switched off (Figure  
174 3E), indicating that the activation of M/TCs boosted the cortical network activation.  
175 Correspondingly, this post-stimulus firing increase recruited more neurons than those activated  
176 during ramp stimulation (LEC: 10.959 % during stimulation vs. 21.233 % post-stimulus; HP:  
177 9.167 % vs. 10.833 %, PFC: 9.195 % vs. 19.540 %). In HP, the post-stimulus network effect  
178 was not restricted to activation of neurons but also related to the increase in the proportion of  
179 neurons that were inhibited after the ramp (7.5 % vs. 11.667 %). Light stimulation of control  
180 animals did not change the average firing rate of units in all four investigated brain regions  
181 (Figure S2A, B).

182           Thus, M/TC firing drives the activation of entorhinal, and subsequently, hippocampal  
183 and prefrontal circuits.

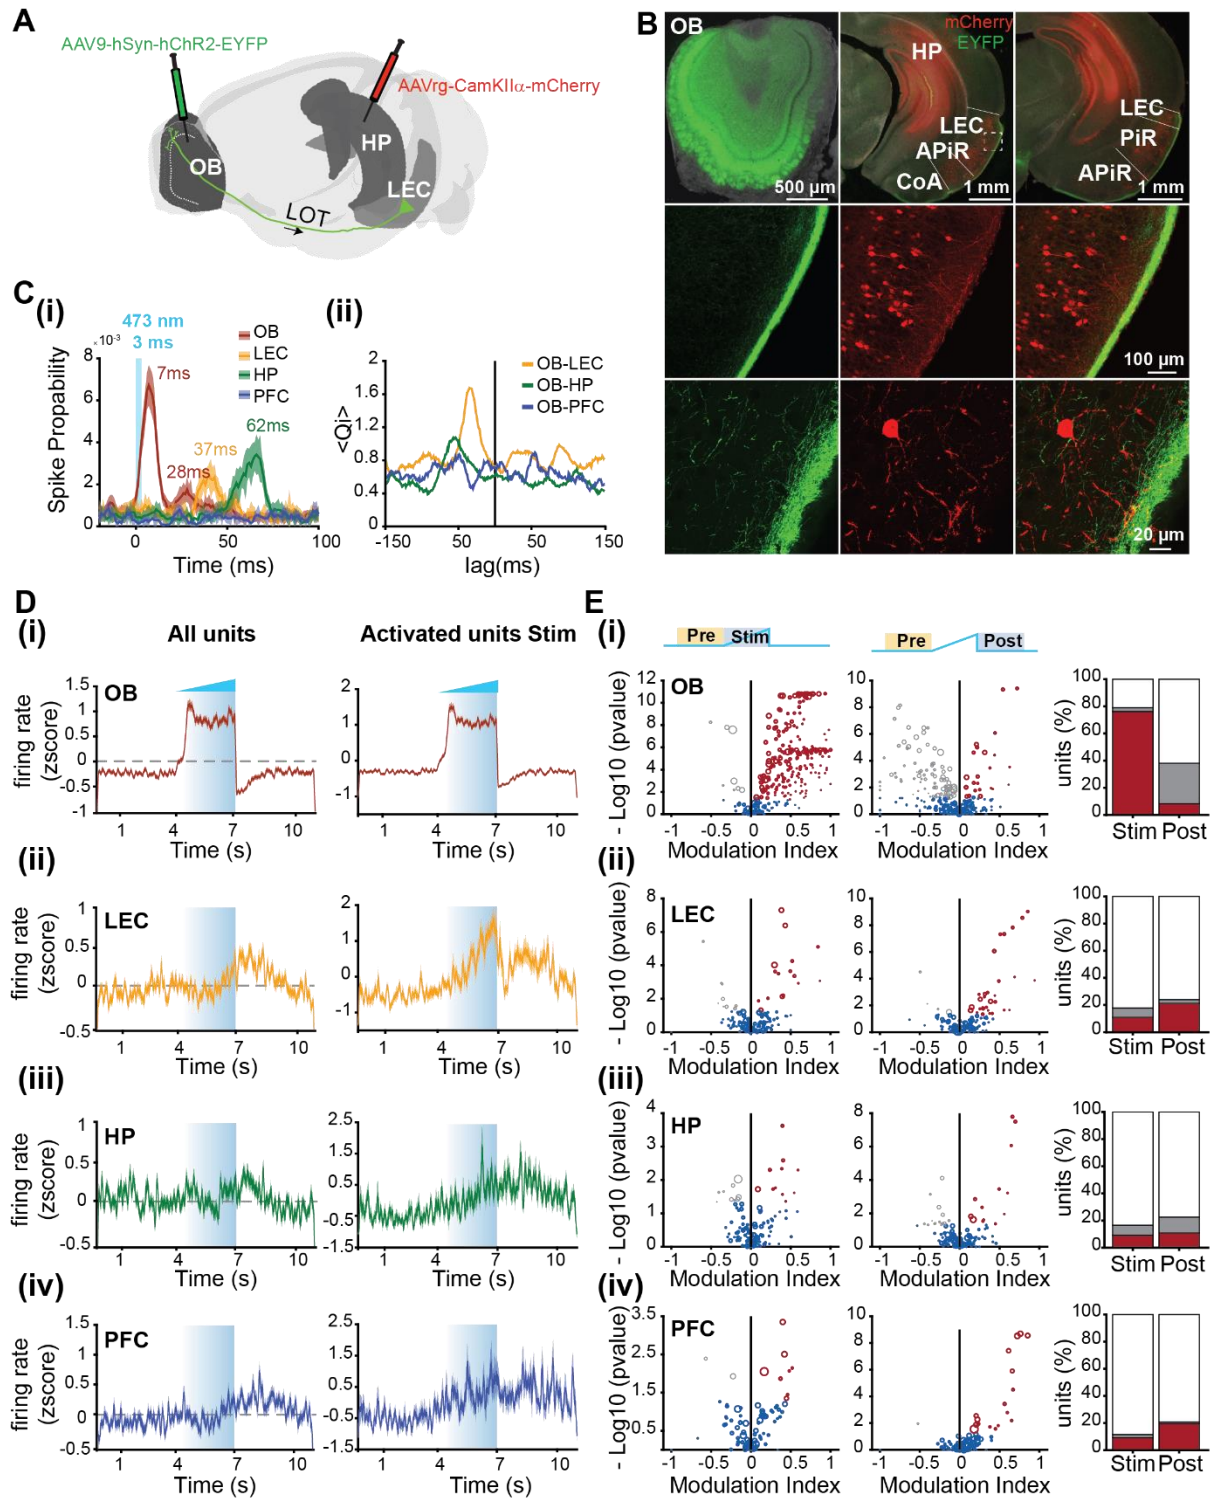

**Figure 3: Effects of optogenetic manipulation of M/TCs on single-unit activity in LEC, HP, and PFC.**

**Figure 3: Effects of optogenetic manipulation of M/TCs on single-unit activity in LEC, HP, and PFC.**

A. Schematic of the experimental protocol used to trace MC axons and neurons projecting to HP. (Brainrender: Claudi et al., 2020).

B. Top, digital photomontages displaying EYFP (green) and mCherry (red) fluorescence in coronal slices including OB (left, injection side of AAV9-hSyn-hChR2-EYFP), HP (middle, injection site of AAVrg-CamKII $\alpha$ -mCherry), and LEC (right). Note the co-expression of EYFP and mCherry in LEC. Middle, EYFP (left), mCherry (middle), and their co-expression in the LEC are shown at larger magnification (dashed box). Bottom, EYFP (left), mCherry (middle), and their co-expression shown at larger magnification for a HP-projecting entorhinal neuron with dendrites targeting layer I.

C. (i) Spike probability of units in OB (red), LEC (yellow), HP (green), and PFC (blue) after a 3 ms light pulse (473 nm) delivered to the OB. Numbers indicate the delay of the peak spike probability for each brain area. (ii). Spike-spike cross-covariance for OB - LEC (yellow), OB - HP (green), and OB - PFC (blue). Negative lags correspond to OB activity driving spiking in other brain areas.

D. (i) Left, z-scored firing rate of units recorded in the OB of cre<sup>+</sup> (red) mice in response to light stimulation. Right, z-scored firing rate of significantly activated units during ramp stimulation. (ii) Same as (i) for units recorded in LEC (yellow). (iii) Same as (i) for units recorded in HP (green). (iv) Same as (i) for units recorded in PFC (blue).

E. (i) Left, volcano plot displaying the MI of SUA firing rates recorded in the OB before (Pre) vs. during (Stim) ramp stimulation (significant activated units are shown in red and significant inhibited units in gray,  $p < 0.01$ , Wilcoxon signed-rank test). Middle, same as the left image but for SUA firing rates before (Pre) vs. after (Post) ramp stimulation. Right, bar plots depicting the percentage of activated (red) and inhibited (gray) units during (Stim) and after (Post) ramp stimulation. (ii) Same as (i) for units recorded in LEC. (iii) Same as (i) for units recorded in HP. (iv) Same as (i) for units recorded in PFC.

184 **M/TC activation boosts beta band coupling within downstream limbic circuits**

185 The long-lasting effects of M/TC stimulation on the neuronal firing of downstream areas, LEC,  
186 HP, and PFC suggest that OB activation might act as a driving force for the generation of  
187 network oscillations in neonatal limbic circuits. To test this hypothesis, we paired ramp light  
188 stimulation of ChR2-transfected M/TCs with LFP recordings in LEC, HP, and PFC of P8-10  
189 mice. Ramp stimulation of M/TCs increased the oscillatory power in LEC, HP, and PFC (Figure  
190 4A, B, Table S5). The most prominent increase was detected for beta band oscillations.  
191 Moreover, we assessed the degree of synchrony between OB and cortical areas during light  
192 stimulation by calculating the imaginary part of coherence, a measure that is insensitive to  
193 false connectivity arising from volume conduction (Nolte et al., 2004). The imaginary coherence  
194 between OB and LEC, OB and HP as well as OB and PFC increased during light activation of  
195 M/TCs, the most prominent effects being detected in beta band range (Figure 4C, Table S6).

196 These results indicate that activation of M/TCs not only induces beta oscillations in OB  
197 but also increases the 12-30 Hz oscillatory coupling between OB and downstream cortical  
198 areas.

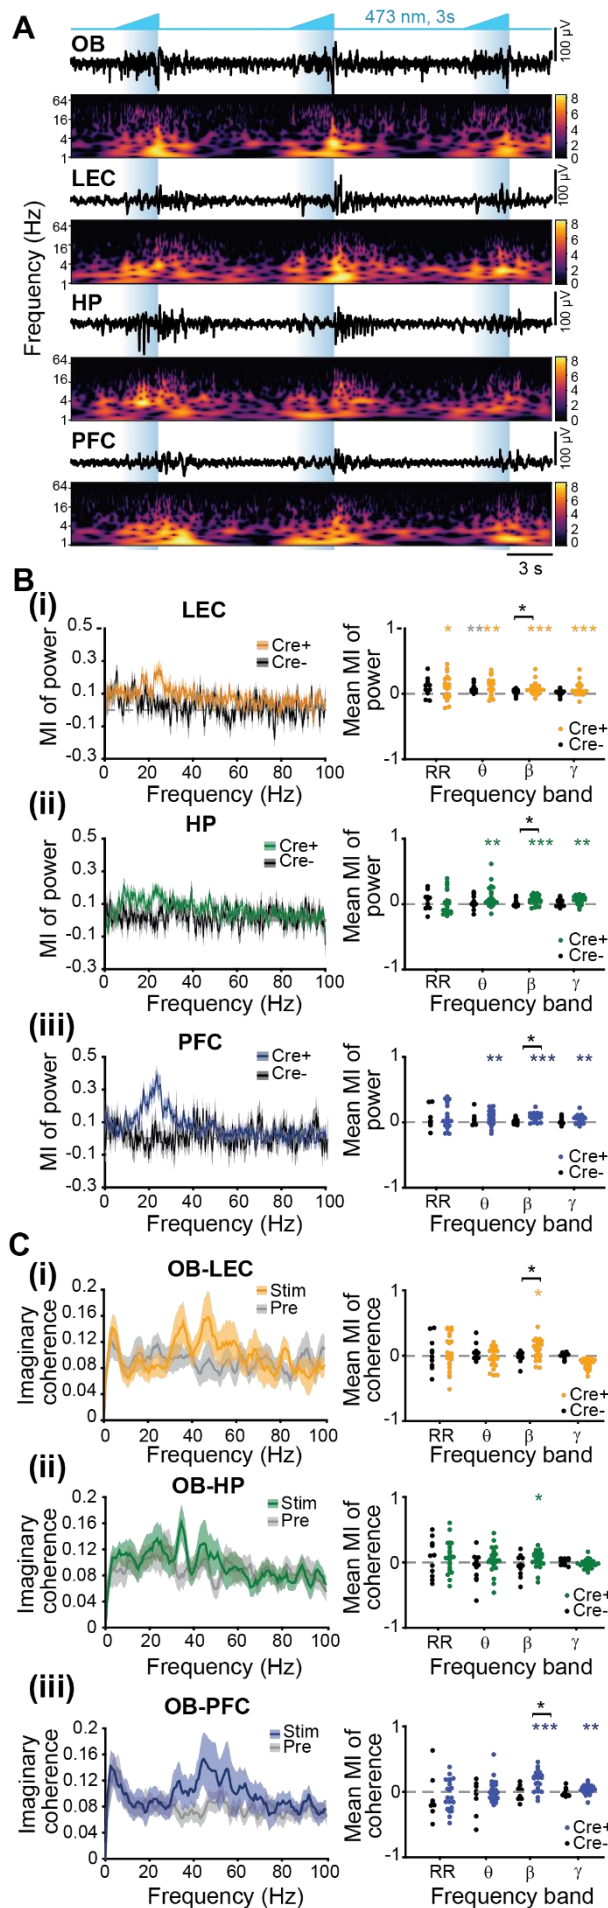

**Figure 4: Oscillatory entrainment of limbic circuits as a result of M/Tc activation by light.**

A. Representative LFP traces recorded in the OB, LEC, HP, and PFC during ramp stimulation of Chr2-transfected M/Tcs accompanied by the corresponding wavelet spectra.

B. (i) Left, plot of MI for power during ramp stimulation of oscillations in LEC for cre<sup>+</sup> (yellow) and cre<sup>-</sup> (black) mice. Right, MI of LFP power averaged for different frequency bands for cre<sup>+</sup> (yellow) and cre<sup>-</sup> (black) mice. (ii) Same as (i) for HP. (iii) Same as (i) for PFC. (colored stars for cre<sup>+</sup>, gray stars for cre<sup>-</sup>, \* p < 0.05, \*\* p < 0.01, \*\*\* p < 0.001, Wilcoxon signed-rank test; black stars for comparison cre<sup>+</sup> vs. cre<sup>-</sup>: \* p < 0.05, Wilcoxon rank-sum test)

C. (i) Left, imaginary coherence between OB and LEC before (gray) and during (yellow) light stimulation. Right, MI of LFP coherence averaged for different frequency bands for cre<sup>+</sup> (yellow) and cre<sup>-</sup> (black) mice. (ii) Same as (i) for OB and HP. (iii) Same as (i) for OB and PFC. (colored stars for cre<sup>+</sup>: \* p < 0.05, \*\* p < 0.01, \*\*\* p < 0.001, Wilcoxon signed-rank test; black stars for comparison cre<sup>+</sup> vs. cre<sup>-</sup>: \* p < 0.05, Wilcoxon rank-sum test).

199 **Inhibition of M/TC output reduces oscillatory power as well as neuronal firing in OB,**  
200 **LEC, and HP**

201 To elucidate whether M/TC activity is necessary for the generation of oscillatory activity in  
202 downstream areas, we used inhibitory DREADDs (hM4D(Gi)) that block vesicle release when  
203 expressed in M/TCs by cre-dependent virus vector injection (AAV9-EF1a-DIO-hM4D(Gi)-  
204 mCherry) at P1 (Figure 5A). At P8, M/TC soma as well as their axons forming the lateral  
205 olfactory tract (LOT), which targets the posterior part of the cerebrum, expressed hM4D(Gi)-  
206 mCherry (Figure 5B). We performed extracellular recordings of LFP and SUA from OB, LEC,  
207 and HP of P8-10 mice (n=35) before (baseline, 20 min) and after (40 min) subcutaneous  
208 injection of C21 (3 mg/kg), a synthetic activator of DREADDs (Thompson et al., 2018) (Figure  
209 5A). Since the impact of OB activation on PFC was rather weak, we did not monitor its activity  
210 during OB silencing.

211 C21 caused broadband power reduction in OB that reached a maximum magnitude  
212 within 5 min after the injection (Figure 5C, D, Table S7) and persisted for at least 2 h (Figure  
213 S3C). The occurrence of discontinuous oscillatory events was lower after C21 injection in OB  
214 (Figure 5F, Table S8), indicating that M/TC activity is involved in the generation of  
215 discontinuous events in OB. Solely, the continuous RR in OB was not affected by the activation  
216 of DREADDs (Figure 5E, Table S7). Moreover, silencing the M/TC output led to a broadband  
217 reduction of oscillatory power in LEC and HP (Figure 5C-E, Table S7). Correspondingly, the  
218 time spend in oscillatory events in LEC and HP decreased after inhibition of M/TC output  
219 (Figure 5F, Table S8). In contrast, for cre<sup>-</sup> mice LFP power and time spend in oscillatory events  
220 did not differ before and after C21 injection (Figure S4A, B, Table S7, 8).

221 Next, we monitored the effects of chemogenetic silencing of M/TCs on the neuronal  
222 firing of downstream areas. Inhibitory DREADDs have been described to mainly reduce the  
223 vesicle release in the expressing neurons, while having little, if any, impact on their ability to  
224 generate action potentials (Roth, 2016; Stachniak et al., 2014). Indeed, C21 injection had a  
225 weak effect on SUA in OB (cre<sup>+</sup>: med MI: -0.071, iqr: -0.322 – 0.208, n=512, p=0.003, Wilcoxon  
226 signed-rank test; cre<sup>-</sup>: med MI: -0.028, iqr: -0.259 – 0.207, n=418, p=0.171, Wilcoxon signed-  
227 rank test; cre<sup>+</sup> vs. cre<sup>-</sup>: p=0.198, Wilcoxon rank-sum test) (Figure 5G, H). In particular, the  
228 neuronal firing within the first 10 min after C21 injection decreased (Figure 5G), being most  
229 likely the result of weaker network interactions within the OB. The DREADDs manipulation  
230 affected not only the network and neuronal activity in OB but also the spike timing by  
231 oscillations. In line with the results of spike-triggered power (STP) analysis, C21 injection  
232 decreased the ability of SUA to entrain the OB in theta, beta, and gamma rhythms (Figure S4A,  
233 Table S9). STP for RR was comparable in the presence and absence of C21 (Table S9). The  
234 temporal relationship between OB spikes and oscillatory events in OB was also assessed by  
235 calculating the phase-locking of SUA to RR and beta rhythm, respectively. In line with the

236 results of STP analysis, the phase-locking to beta (Baseline: med: 0.105, iqr: 0.061 – 0.152;  
237 C21: med: 0.093, iqr: 0.053 – 0.139;  $n_{\text{units}}=524$  from 16 mice,  $p=0.003$ , LMEM) was reduced  
238 after C21 injection. In contrast, the phase coupling to RR (Baseline: med: 0.094, iqr: 0.051 –  
239 0.153; C21: med: 0.159, iqr: 0.078 – 0.310;  $n_{\text{units}}=524$  from 16 mice,  $p=2.20 \times 10^{-16}$ , LMEM) was  
240 increased after C21 injection (Figure S4B).

241 Silencing the M/TC output strongly reduced the LEC firing ( $cre^+$ : med MI: -0.420, iqr: -  
242 0.598 – -0.108,  $n=126$ ,  $p=2.96 \times 10^{-16}$ , Wilcoxon signed-rank test;  $cre^-$ : med MI: 0.069, iqr: -  
243 0.144 – 0.364,  $n=49$ ,  $p=0.168$ , Wilcoxon signed-rank test;  $cre^+$  vs.  $cre^-$ :  $p=3.87 \times 10^{-10}$ , Wilcoxon  
244 rank-sum test), the effects lasting > 1 hour after C21 injection (Figure 5G, H). In contrast,  
245 silencing of M/TC output had a shorter (~20 min) and weaker impact on hippocampal firing  
246 ( $cre^+$ : med MI: -0.102, iqr: -0.438 – 0.230,  $n=102$ ,  $p=0.036$ , Wilcoxon signed-rank test;  $cre^-$ :  
247 med MI: -0.047, iqr: -0.256 – 0.109,  $n=74$ ,  $p=0.119$ , Wilcoxon signed-rank test;  $cre^+$  vs.  $cre^-$ :  
248  $p=0.484$ , Wilcoxon rank-sum test).

249 These results indicate that silencing the M/TC output decouples neuronal firing from  
250 beta oscillations in OB and decreases the oscillatory power and neuronal firing in LEC, as a  
251 first downstream station of OB projections. On its turn, the weaker drive from LEC leads to  
252 poor oscillatory entrainment of HP, yet without significant change of its neuronal firing.



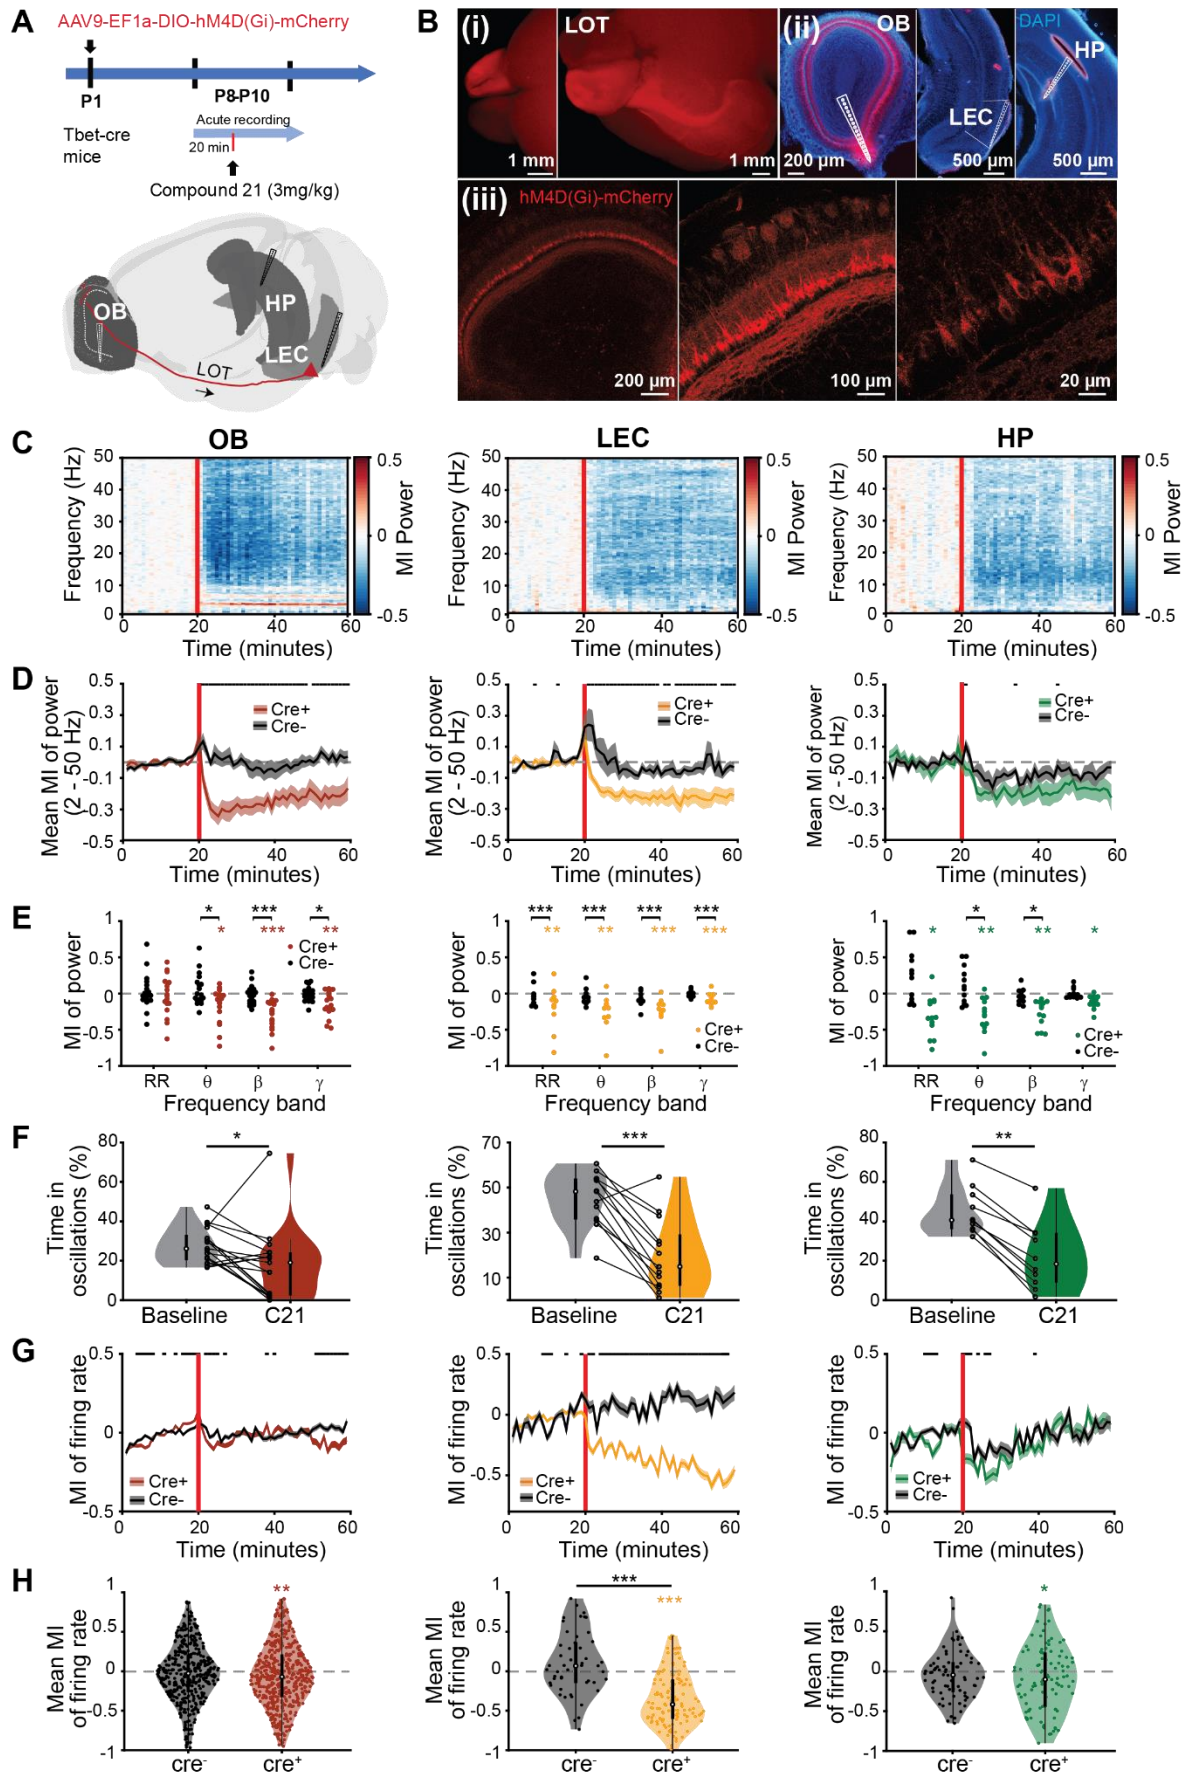

**Figure 5: Effects of silencing MTC output by inhibitory DREADDs on the oscillatory activity in OB, LEC, and HP.**

**Figure 5: Effects of silencing M/TC output by inhibitory DREADDs on the oscillatory activity in OB, LEC, and HP.**

A. Top, schematic of the experimental protocol. Bottom, schematic of recording configuration for simultaneous extracellular recordings in OB, LEC, and HP (Brainrender: Claudi et al., 2020).

B. (i) Photograph of the dorsal (left) and ventral side (right) of a brain from a P8 Tbet-cre<sup>+</sup> mouse showing mCherry (red) expression in the OB and M/TC axonal projections (LOT) to PIR and LEC. (ii) Digital photomontages displaying the Dil labeled electrode track (red) in DAPI (blue) stained slices including the OB (left), LEC (middle), and HP (right) from a P10 mouse. (iii) Confocal images displaying the MCL of the right OB at different magnifications. MC bodies, as well as dendrites, express mCherry.

C. Color-coded MI of LFP power before and after C21 injection in OB (left), LEC (middle), and HP (right). Vertical red lines correspond to the C21 injection.

D. Plots displaying the MI of LFP power averaged for 2 to 50 Hz before and after C21 injection in cre<sup>+</sup> (colored) and cre<sup>-</sup> (black) mice for OB (right, red), LEC (middle, yellow), and HP (right, green). Vertical red lines correspond to the C21 injection. (black line:  $p < 0.05$ , Wilcoxon rank-sum test).

E. MI of LFP power averaged for different frequency bands for cre<sup>+</sup> (colored) and cre<sup>-</sup> (black) mice for OB (left), LEC (middle), and HP (right). (Wilcoxon signed-rank test, colored stars for cre<sup>+</sup>: \*  $p < 0.05$ , \*\*  $p < 0.01$ , \*\*\*  $p < 0.001$ ; black stars for comparison cre<sup>+</sup> vs. cre<sup>-</sup>: \*  $p < 0.05$ , \*\*  $p < 0.01$ , \*\*\*  $p < 0.001$ , Wilcoxon rank-sum test)

F. Violin plots displaying the percentage of time spend in discontinuous oscillatory events before (Baseline, gray) and after C21 injection (C21, colored). Black dots and lines correspond to individual animals. (\*  $p < 0.05$ , \*\*  $p < 0.01$ , \*\*\*  $p < 0.001$ , Wilcoxon signed-rank test)

G. Line plots displaying the MI of averaged SUA firing rates before and after C21 injection in cre<sup>+</sup> (colored) and cre<sup>-</sup> (black) mice for OB (left, red), LEC (middle, yellow), and HP (right, green). Vertical red lines correspond to the C21 injection. (black line:  $p < 0.05$ , Wilcoxon signed-rank test).

H. Violin plots displaying the MI of averaged SUA firing rates after C21 injection for cre<sup>-</sup> (black) and cre<sup>+</sup> mice (colored) recorded in OB (left, red), LEC (middle, yellow), and HP (right, green). Red and black dots correspond to individual units. (colored stars for cre<sup>+</sup>: \*  $p < 0.05$ , \*\*  $p < 0.01$ , \*\*\*  $p < 0.001$ , Wilcoxon signed-rank test; black stars for comparison cre<sup>+</sup> vs. cre<sup>-</sup>: \*\*\*  $p < 0.001$ , Wilcoxon rank-sum test)

253 **Inhibition of M/TC output reduces the communication between OB and downstream**  
254 **cortical areas**

255 To back up the hypothesis that the M/TC activity controls the developmental entrainment of  
256 limbic circuits, we monitored the communication between OB and downstream areas during  
257 silencing of M/TC output with DREADDs by using three distinct measures. First, we assessed  
258 the synchrony between OB, LEC, and HP by calculating the imaginary coherence in different  
259 frequency bands before (baseline) and after C21 injection (C21) (Figure 6A, B). MIs for beta  
260 coherence between OB and LEC, and OB and HP were significantly reduced after C21  
261 injection. In contrast, the coherence in other frequency bands was not affected by C21 injection  
262 (Figure 6A, B, Table S10). Moreover, the C21-induced changes in the beta band were not  
263 detected in cre<sup>-</sup> mice (Figure S6A, Table S10).

264 Second, we calculated the phase-amplitude coupling (PAC) to elucidate the role of  
265 M/TCs in the modulation of cortical beta oscillations by the RR phase in OB. C21 injection  
266 significantly reduced the z-scored PAC values between the OB RR phase and the amplitude  
267 of beta oscillations in LEC (Baseline: med: 2.499, iqr: 1.624 – 2.883; C21: med: 1.608, iqr:

268 0.674 – 2.361, n=13, p=0.017, Wilcoxon signed-rank test) and HP (Baseline: med: 2.363, iqr:  
269 2.135 – 2.764; C21: med: 1.907, iqr: 1.319 – 2.248, n=10, p=0.037, Wilcoxon signed-rank test)  
270 (Figure 6C). Additionally, fewer mice showed significant RR-beta PAC values after C21  
271 injection (z-score > 1.96) in LEC (Baseline: 53.85% vs. C21: 39.77%) and HP (90% vs. 50 %).

272 Third, we tested the effect of C21 on the directionality of interactions between OB, LEC,  
273 and HP (Figure 6D). We calculate the SDR and found that the prominent drive from OB to LEC  
274 was absent after silencing of M/TC output, the values for OB → LEC and LEC → OB being  
275 comparable (Figure 6Di, Table S11,12). Similarly, the drive from OB to HP was disrupted by  
276 C21 injection (Figure 6Diii, Table S11,12). In contrast, the directionality of interactions between  
277 LEC and HP was not affected by C21 injection. As reported for the baseline conditions, the  
278 mutual interactions LEC-HP persisted after M/TC silencing (Figure 6Dii, Table S11,12).  
279 Moreover, the C21-induced changes in directionality were not detected in *cre* mice (Figure  
280 S5B, Table S11,12).

281 Thus, these results show that the M/TC activity is critical for the communication  
282 between OB and its downstream cortical areas.

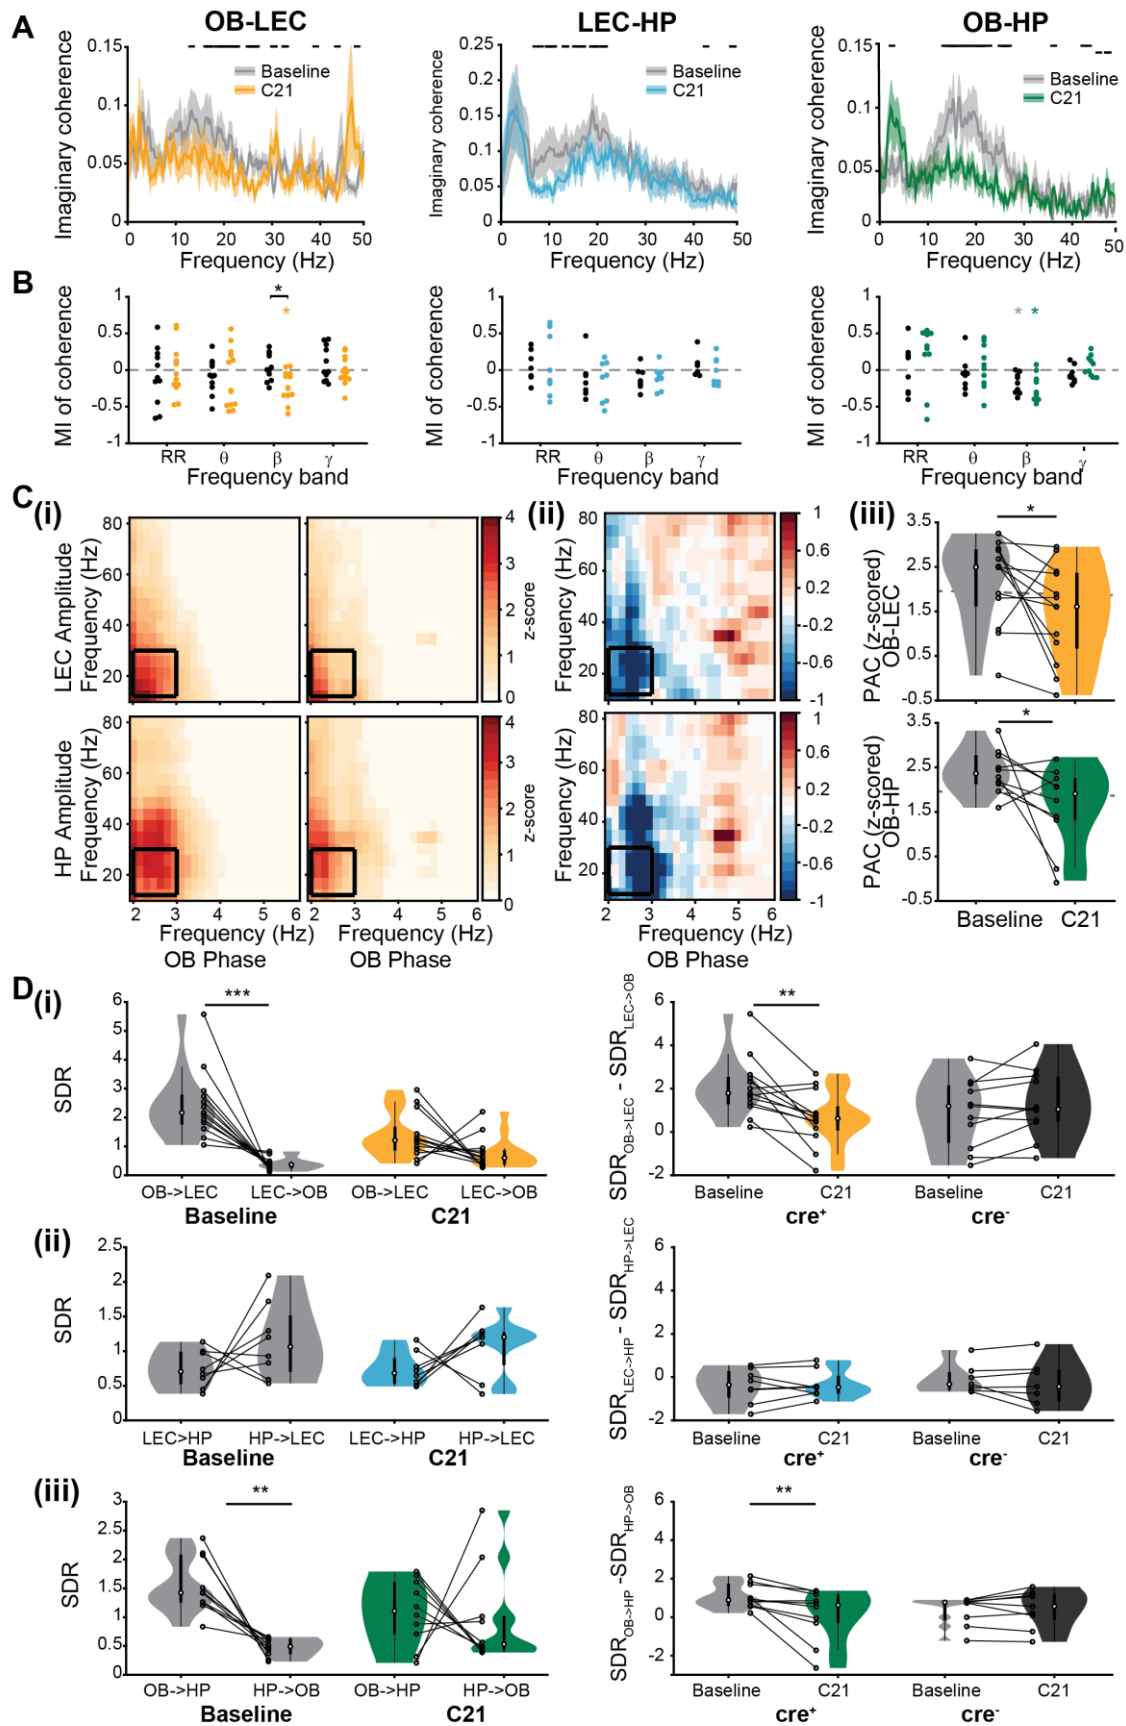

**Figure 6: Modulation of functional communication within olfactory-cortical networks through silencing the M/TC output by inhibitory DREADDs.**

**Figure 6: Modulation of functional communication within olfactory-cortical networks through silencing the M/TC output by inhibitory DREADDs.**

A. Imaginary coherence calculated for OB - LEC (left, yellow), LEC - HP (middle, light blue), and OB - HP (right, green), before (Baseline, gray) and after C21 injection (C21, colored). (black line:  $p < 0.05$ , Wilcoxon rank-sum test).

B. MI of coherence averaged for different frequency bands between OB and LEC (left, yellow), LEC and HP (middle, light blue), and OB and HP (right, green), for  $cre^+$  (colored) and  $cre^-$  (black) mice. (colored stars for  $cre^+$ , gray stars for  $cre^-$ : \*  $p < 0.05$ , Wilcoxon signed-rank test; black stars for comparison  $cre^+$  vs.  $cre^-$ : \*  $p < 0.05$ , Wilcoxon rank-sum test)

C. (i) Z-scored phase-amplitude coupling (PAC) between OB phase and LEC (top) and HP (bottom) amplitude, before (Baseline) and after C21 injection (C21). (ii) Difference of PAC values after and before C21 injection for OB - LEC (top) and OB - HP (bottom). (iii) PAC averaged for RR-beta coupling (black box in (i)) for OB - LEC (top) and OB - HP (bottom), before (Baseline, gray) and after C21 injection (colored). Dotted gray line corresponds to a z-score of 1.96. (\*  $p < 0.05$ , Wilcoxon signed-rank test).

D. (i) SDR calculated for OB and LEC. Left, SDR values for OB  $\rightarrow$  LEC and LEC  $\rightarrow$  OB before (Baseline, gray) and after C21 injection (C21, yellow). Right, difference of SDR values for both directions for  $cre^+$  and  $cre^-$  mice. (ii) Same as (i) for LEC and HP (blue). (iii) Same as (i) for OB and HP (green). Black dots and lines correspond to individual animals. (\*\*  $p < 0.01$ , \*\*\*  $p < 0.001$ , Wilcoxon signed-rank test).

283 **DISCUSSION**

284 Long-range interactions within limbic circuits emerge early in life (Chini and Hanganu-Opatz,  
285 2021), yet it is still unknown whether the coordinated activity patterns underlying the coupling  
286 are endogenously generated or result through the driving force of sensory systems. Besides  
287 muscle twitches (Rio-Bermudez and Blumberg, 2018) and passive tactile sensation, olfactory  
288 inputs are likely candidates for the instruction of limbic circuitry development. Newborn rodents  
289 are not only able to smell from birth on but, importantly, also use olfactory information for  
290 learning and cue-directed behaviors such as localization of the nipples of the dam (Logan et  
291 al., 2012; Welker, 1964). A first piece of evidence for the critical role of olfaction for limbic  
292 development is the fact that the neonatal OB shows functional coupling with the LEC, the  
293 gatekeeper of the limbic circuitry, during discontinuous network oscillations in the theta-beta  
294 frequency range as well as in the continuous respiration-related rhythm (RR) (Gretenkord et  
295 al., 2019). Here, we extended these findings and uncovered that MC firing sets a beta band  
296 entrainment also in downstream areas, such as HP and PFC. The temporal dynamics of  
297 oscillatory and firing activity revealed that even in periods without active odor sampling, OB  
298 drives the activation of limbic circuits.

299 Layer-specific analysis of SUA revealed that M/TC activation leads to a complex  
300 entrainment of the OB microcircuit that results in augmented firing rate also for interneurons in  
301 the GCL, EPL, and GL. Experimental and modeling studies have shown that both beta and  
302 gamma oscillations in the OB rely on dendro-dendritic interactions between M/TCs and GCs  
303 (David et al., 2015; Fourcaud-Trocmé et al., 2014; Neville and Haberly, 2003; Osinski et al.,  
304 2018; Osinski and Kay, 2016). In adults, the emergence of gamma and beta oscillations is

305 controlled by different excitability states of GCs as well as their dependency on centrifugal  
306 input, with beta oscillations relying on a higher GC excitability and centrifugal feedback  
307 projections (David et al., 2015; Martin et al., 2006; Osinski and Kay, 2016). However, gamma  
308 oscillations are absent in the neonatal OB, most likely as a result of the late functional  
309 integration of interneurons into local circuits and the different biophysical properties of MCs  
310 and GCs during development (Dietz et al., 2011; Fletcher et al., 2005; Yu et al., 2015). Instead,  
311 discontinuous beta band oscillations are present not only in OB but also in other sensory and  
312 limbic areas (Bitzenhofer et al., 2017b). In the neonatal PFC, they have been shown to  
313 accelerate along development until reaching the gamma band range at juvenile age  
314 (Bitzenhofer et al., 2020). Similarly, acceleration of beta to gamma oscillations takes place in  
315 V1 during the critical period for vision (Chen et al., 2015; Hoy and Niell, 2015). Whether the  
316 beta band activity in OB undergoes a similar transition to faster rhythms and how this process  
317 is controlled by interactions within OB and by feedback projections from PiR and LEC remain  
318 to be elucidated.

319 The present data show that the OB network activation entrains downstream cortical  
320 areas in beta oscillations. In adult rodents, the axonal terminals of MCs have been found to  
321 target fan and pyramidal neurons in LII/III of LEC that, on their turn, relay this information to  
322 the HP (Schwerdtfeger et al., 1990; Wouterlood and Nederlof, 1983). The axonal projections  
323 from layer II/III LEC pyramidal neurons to CA1 are involved in associative odor learning in  
324 adults (Li et al., 2017). Already at neonatal age, MC axons reach layer I of LEC (Gretenkord et  
325 al., 2019; Walz et al., 2006). Here, projections of layer II/III neurons that target the HP were  
326 detected and they might establish synaptic contacts with the MC axons. Optogenetic  
327 stimulation revealed that the activation of M/TCS induced delayed firing of LEC neurons and  
328 HP neurons, indicating that the pathway OB-to-HP is indeed already functional from birth on.  
329 CA1 receives entorhinal input not only via the direct performant path but also through the tri-  
330 synaptic path, spanning DG and CA3 (Basu et al., 2016). The long latency (~ 60 ms) in light-  
331 induced CA1 firing might, therefore, be partly mediated by the tri-synaptic path. Of note, it was  
332 recently shown that a distinct but rather small population of LEC layer II neurons directly  
333 projects to the neonatal PFC (Xu et al., 2021), yet light stimulation of M/TCS did not recruit it.

334 Coordinated activity patterns in OB organized by MCs promote not only neuronal firing  
335 but also network activation in downstream areas. Ramp light stimulation of M/TCS led to an  
336 increase of beta band power in LEC, HP, and PFC. This power surge was accompanied by  
337 increased long-lasting SUA firing in all three brain areas, indicating that the initial activation of  
338 neurons is followed by activation of the local networks in LEC, HP, and PFC. Conversely,  
339 blocking vesicle release on MC synapses by DREADDs reduced the broadband power as well  
340 as neuronal firing in LEC and HP. Moreover, coherence analysis revealed increased

341 oscillatory, mainly beta band coupling, between OB and cortical areas during ramp stimulation,  
342 whereas inhibition of M/TCS vesicle release reduced the drive OB → LEC and OB → HP as  
343 well as RR-beta cross-frequency coupling between OB-LEC and OB-HP. While the artificial  
344 activation of MCs might not be entirely comparable to the neural processes underlying odor  
345 sampling and processing during a learning task, these results identify the beta rhythm as a  
346 potential mechanism of long-range communication between OB and downstream cortical  
347 networks.

348         What might be the relevance of OB-controlled beta band activation of cortical circuits  
349 during early postnatal development? Beta oscillations have been reported to play a key role in  
350 working memory and decision making in adult humans (Spitzer and Haegens, 2017). Further,  
351 prominent beta band synchrony between cortical areas has been identified during olfactory-  
352 guided memory and decision making tasks in rodents (Igarashi et al., 2014; Martin et al., 2007;  
353 Rangel et al., 2016; Symanski et al., 2021). A similar, but sniffing-independent increase in  
354 hippocampal beta oscillations has been observed during an object learning task (Iwasaki et  
355 al., 2021). Moreover, the firing of beta-entrained CA1 interneurons during an odor-place  
356 associative memory and decision-making task related to an accurate performance, indicating  
357 that beta oscillations enable temporal coordination and recruitment of neurons within functional  
358 cell assemblies (Rangel et al., 2016; Symanski et al., 2021). In line with these experimental  
359 data, modeling confirmed that beta oscillations optimally contribute to the coupling of cell  
360 assemblies over long axonal conductance delays (Bibbig et al., 2002; Kopell et al., 2011,  
361 2000). During development, discontinuous beta band events that have been identified in PFC,  
362 HP, and LEC might facilitate the formation of initial cell assemblies with relevance for cognitive  
363 performance later in life. We previously showed that interfering with beta band oscillations  
364 during a defined developmental period causes network miswiring and poor behavioral  
365 performance of adult mice (Bitzenhofer et al., 2021). Similarly, in a mouse model of psychiatric  
366 risk reduced beta band activity at neonatal age has been found to correlate with later cognitive  
367 deficits (Chini et al., 2020; Xu et al., 2021). Here, we identified the olfactory activity as a  
368 prominent driver of these early beta oscillations. The results let us hypothesize that transient  
369 disturbance of neonatal olfactory processing precludes the functional refinement of entorhinal-  
370 hippocampal-prefrontal circuits, ultimately leading to cognitive deficits in adulthood. Further  
371 research is warranted to directly test this hypothesis and elucidate the role of early activity  
372 patterns in OB for cognitive development.

373

374

375

376

## 377 **MATERIALS AND METHODS**

### 378 ***Ethical Approval***

379 All experiments were performed in compliance with the German laws and the guidelines of the  
380 European Union for the use of animals in research (European Union Directive 2010/63/EU)  
381 and were approved by the local ethical committee (Behörde für Gesundheit und  
382 Verbraucherschutz Hamburg, ID 15/17).

### 383 ***Animals***

384 Time-pregnant C57Bl/6/J and Tbet-cre mice from the animal facility of the University Medical  
385 Center Hamburg-Eppendorf were housed individually in breeding cages at a 12h light / 12h  
386 dark cycle and fed ad libitum. Offspring (both sexes) were injected with either AAV9-Ef1a-  
387 DIO-hChR2(E123T\_T159C)-EYFP (Addgene, Plasmid #35509) or AAV9-EF1a-DIO-  
388 hm4D(Gi)-mCherry (Addgene, Plasmid #50461) virus at postnatal day (P) 0 or 1. Genotypes  
389 were determined using genomic DNA and following primer sequences (Metabion,  
390 Planegg/Steinkirchen, Germany) as described previously (Gretenkord et al. 2019): for Cre:  
391 PCR forward primer 5'-ATCCGAAAAGAAAACGTTGA-3' and reverse primer 5'-  
392 ATCCAGGTTACGGATATAGT-3'. The PCR reactions were as follows: 10 min at 95 °C, 30  
393 cycles of 45 s at 95 °C, 90 s at 54 °C, and 90 s at 72 °C, followed by a final extension step of  
394 10 min at 72 °C. In addition to genotyping, EGFP expression in OB was detected using a dual  
395 fluorescent protein flashlight (Electron microscopy sciences, Hatfield, PA, USA) prior to  
396 surgery. At P8-10 cre<sup>-</sup> and cre<sup>+</sup> mice underwent light stimulation or Compound 21 injections  
397 and *in vivo* multi-side electrophysiological recordings.

### 398 ***Surgical procedures and recordings***

#### 399 *Virus injection for transfection of MTCs with ChR2 and hm4D(Gi)*

400 For transfection of MTCs with the ChR2 derivative E123T/T159C or inhibitory DREADDs  
401 (hm4D(Gi)), P0-1 pups were fixed into a stereotaxic apparatus and received unilateral  
402 injections of one of two viral constructs (AAV9-Ef1a-DIO hChR2(E123T/T159C)-EYFP, 200 µl  
403 at titer  $\geq 1 \times 10^{13}$  vg/mL, Plasmid, #35509, Addgene, MA, USA; AAV9-EF1a-DIO-hM4D(Gi)-  
404 mCherry, 200 µl at titer  $\geq 1 \times 10^{14}$  vg/mL Plasmid #50461, Addgene, MA, USA). The virus was  
405 produced by Addgene or the Virus Facility of the University Medical Center Eppendorf. A total  
406 volume of 200 nl was slowly (200 nl/min) delivered at a depth of around 0.5 mm into the right  
407 OB using a micropump (Micro4, WPI, Sarasota, FL). Following injection, the syringe was left  
408 in place for at least 30 s to avoid reflux of fluid. Pups were maintained on a heating blanket  
409 until full recovery and returned to the dam.

410

411



412 *Virus injection for tracing*

413 For the transfection of M/TC axons with EYFP and the retrograde labeling of HP-projecting  
414 neurons with mCherry, P0-1 pups received the viral construct AAV9-hSyn-hChR2(H134R)-  
415 EYFP (200  $\mu$ l at titer  $\geq 1 \times 10^{13}$  vg/mL, #26973-AAV9, Addgene, MA, USA) into the OB and the  
416 retrograde virus AAVrg-CamKII $\alpha$ -mCherry (80  $\mu$ l at titer  $\geq 7 \times 10^{12}$  vg/mL, #114469-AAVrg,  
417 Addgene, MA, USA) into the HP. Virus injection was performed similarly as for the transfection  
418 of M/TCs with ChR2 or hm4D(Gi). After 10 days, the brains of investigated mice were perfused  
419 with 4% paraformaldehyde (PFA), sliced and MC axons and HP-projecting neurons in LEC and  
420 PIR were imaged using a confocal microscope.

421 *Surgical procedure for electrophysiology*

422 For in vivo recordings, P8-10 mice underwent surgery according to previously described  
423 protocols (Brockmann et al., 2011; Gretenkord et al., 2019; Kostka et al., 2020). Under  
424 isoflurane anesthesia (induction: 5 %, maintenance: 2.5 %, Forane, Abbott), the skin above  
425 the skull was removed and 0.5 % bupivacaine / 1 % lidocaine was locally applied on the neck  
426 muscles. Two plastic bars were mounted on the nasal and occipital bones with dental cement.  
427 The bone above the right OB (0.5-0.8 mm anterior to frontonasal suture, 0.5 mm lateral to inter-  
428 nasal suture), LEC (0 mm posterior to lambda, 6-7.5 mm lateral from the midline), HP (2.5 mm  
429 anterior to lambda, 3.5 mm lateral from the midline) and PFC (0.5 mm anterior to bregma, 0.1-  
430 0.5 mm lateral from the midline) was carefully removed by drilling a hole of  $< 0.5$  mm in  
431 diameter. Throughout surgery and recording session the mice were maintained on a heating  
432 blanket at 37°C.

433 *Multi-site electrophysiological recordings in vivo*

434 Three-side or four-side recordings were performed in non-anesthetized P8-10 mice. For this,  
435 one-shank electrodes (NeuroNexus, MI, USA) with 16 recording sites (0.4-0.8 M $\Omega$  impedance,  
436 50  $\mu$ m inter-site spacing for recordings in OB and HP, 100  $\mu$ m inter-site spacing for recordings  
437 in LEC and PFC) were inserted into OB (0.5-1.8 mm, angle 0°), LEC (for 4-side recordings,  
438 depth: 2 mm, angle: 180°; for 3-side recordings, depth: 2-2.5 mm, angle: 10°), HP (1.3-1.9 mm,  
439 angle 20°) and PFC (1.8-2.1 mm, angle 0°). For light stimulation one-shank optrodes  
440 (NeuroNexus, MI, USA) with the same configuration as the electrodes were inserted in the OB.  
441 Before insertion, the electrodes were covered with Dil (1,1'-Dioctadecyl-3,3',3',3'-  
442 tetramethylindocarbocyanine perchlorate, Molecular Probes, Eugene, OR). A silver wire was  
443 inserted into the cerebellum and served as a ground and reference electrode. Before data  
444 acquisition, a recovery period of 20 min following the insertion of electrodes was provided.  
445 Extracellular signals were band-pass filtered (0.1 Hz-9 kHz) and digitized (32 kHz or 32,556  
446 kHz) by a multichannel amplifier (Digital Lynx SX; Neuralynx, Bozeman, MO; USA) and  
447 Cheetah acquisition software (Neuralynx). Spontaneous activity was recorded for at least 20

448 min before light stimulation or Compound 21 (C21, Hellobio, Ireland) injection. The position of  
449 recording electrodes in OB, LEC, HP, and PFC was confirmed after histological assessment  
450 *post-mortem*. For the analysis of LFP in OB, the recording site centered in the EPL was used,  
451 whereas for HP the recording site located in the CA1 was considered. For analysis of LFP in  
452 LEC only recording sites that were histologically confirmed to be located in superficial  
453 entorhinal layers were used. Similarly, only recordings sites confined to the prelimbic sub-  
454 division of PFC were considered. For the analysis of spiking activity, all recording sites  
455 confirmed to be located in the areas of interest (OB, LEC, HP, and PFC) were considered.  
456 When necessary, spikes recorded in OB were assigned to specific layers according to the  
457 location of recording sites.

### 458 ***Morphology***

459 Mice were anesthetized with 10% ketamine (Ketamidol, Richter Pharma AG, Germany) / 2%  
460 xylazine (Rompun, Bayer, Germany) in 0.9% NaCl solution (10 µg/g body weight, i.p.) and  
461 transcardially perfused with Histofix (Carl Roth, Germany) containing 4% PFA. Brains were  
462 postfixed in 4% PFA for 24 h and sliced. Slices (100 µm-thick) were mounted with Fluoromount  
463 containing DAPI (Sigma-Aldrich, MI, USA). The positions of the Dil-labeled extracellular  
464 electrodes in the OB, LEC, HP, and PFC were reconstructed to confirm their location. Virus  
465 expression was verified by EYFP (for ChR2) or mCherry (for hM4D(Gi)) fluorescence in the  
466 right OB. For confocal imaging of EYFP or mCherry fluorescence in M/TCs, HP, and LEC, 50  
467 µm-thick slices mounted with Vectashield (CA, USA) were used.

### 468 ***Light stimulation***

469 Activation of M/TCs was achieved by either ramp or pulse light stimulation applied using a  
470 diode laser (473 nm; Omicron, Austria) which was controlled by an arduino uno (Arduino, Italy).  
471 For ramp stimulation, a light stimulus with linear increasing power (3 s rise time) was presented  
472 30-60 times. For pulse stimulation 3 ms light pulses at 2 Hz were delivered. Laser power was  
473 adjusted for every recording (1.37-5.15 mW) to reliably induce neuronal firing.

### 474 ***Compound 21 injection***

475 Compound 21 (3 mg/kg solved in 0.9% NaCl) was injected subcutaneously after >20 min  
476 recording of baseline activity, while the mouse was fixed in the stereotaxic apparatus. The  
477 activity was recorded for 40-120 min post-injection.

### 478 ***Data Analysis***

479 *LFP analysis.* Data were analyzed offline using custom-written scripts in the MATLAB  
480 environment (MathWorks, Natick, MA). Data were first low-passed filtered (<100 Hz) using a  
481 third-order Butterworth filter before down-sampling by factor 20 to 1.6 kHz to analyze LFP. All  
482 filtering procedures were performed in a manner preserving phase information.

483 *Detection of oscillatory activity.* Discontinuous network oscillations in the LFP recorded from  
484 OB, LEC, and HP before and after C21 injection were detected using a previously developed  
485 unsupervised algorithm (Cichon et al., 2014). Briefly, deflections of the root mean square of  
486 band-pass filtered (4-100 Hz) signals exceeding a variance-depending threshold (2 times the  
487 standard deviation from the mean) were assigned as oscillatory periods. Only oscillatory  
488 periods lasting at least 1 s were considered for analysis.

489 *Power spectral density.* Power spectral density was analyzed for either the entire baseline  
490 period, 2 s long periods before (Pre), and during light ramp stimulation (Stim) for recordings  
491 combined with optogenetic manipulation. For recordings paired with DREADD manipulation,  
492 the power was either calculated for every minute or averaged for the entire baseline period (19  
493 min) and post C21 injection period (30 min). Power was calculated using Welch's method with  
494 non-overlapping windows of 2 s (ramp periods) or 3 s length. Time-frequency plots of power  
495 were calculated with a continuous wavelet transform (Morlet wavelet).

496 *Coherence.* The imaginary part of coherence, which is insensitive to volume-conduction-based  
497 effects (Nolte et al., 2004), was calculated for the same time periods as the power by taking  
498 the absolute value of the imaginary component of the normalized cross-spectrum:

499

$$500 \quad C_{XY}(f) = \left| \text{Im} \left( \frac{P_{XY}(f)}{\sqrt{P_{XX}(f)P_{YY}(f)}} \right) \right|.$$

501 *Spectral Dependency Ratio.* The Spectral Dependency Ratio (SDR) was calculated according  
502 to Shajarisales et al. (Shajarisales et al., 2015) from the power spectral densities ( $S_x(f)$  and  
503  $S_y(f)$ ) of the signals X and Y:

$$504 \quad SDR_{X \rightarrow Y} = \frac{\text{mean}(S_y(f))}{\text{mean}(S_x(f)) * \text{mean}\left(\frac{S_y(f)}{S_x(f)}\right)}$$

$$505 \quad SDR_{Y \rightarrow X} = \frac{\text{mean}(S_x(f))}{\text{mean}(S_y(f)) * \text{mean}\left(\frac{S_x(f)}{S_y(f)}\right)}$$

506 The most likely direction of causation is the one having significantly larger SDR values.  
507 ([https://github.com/OpatzLab/HanganuOpatzToolbox/tree/master/LFP analysis/getSDR.m](https://github.com/OpatzLab/HanganuOpatzToolbox/tree/master/LFP%20analysis/getSDR.m))

508 *Spiking analysis.* Single units were automatically detected and clustered using the python-  
509 based software klusta (Rossant et al., 2016) and manually curated using phy  
510 (<https://github.com/cortex-lab/phy>). The firing rate was computed by dividing the total number  
511 of spikes by the duration of the analyzed time window. To assess the spike probability,  
512 histograms of spike count using 1 ms bins were calculated for periods around the light pulse  
513 (50 ms before to 150 ms after) and normalized to the number of delivered light pulses. Cross-

514 covariance of spike trains was calculated as described previously (Gretenkord et al., 2019;  
515 Siapas et al., 2005). Briefly, cross-covariance for two spike trains  $N_i$  and  $N_j$ , was estimated  
516 from the cross-correlation histogram ( $J_{ij}^{T,b}(u)$ ) as follows:

$$517 \quad \hat{q}_{ij}(u) = \frac{J_{ij}^{T,b}(u)}{bT} - \hat{P}_i \hat{P}_j,$$

518 ( $b = \text{binsize}$ ,  $T = \text{observation period}$ ,  $\hat{P}_i = \frac{N_i(T)}{T}$ ,  $\hat{P}_j = \frac{N_j(T)}{T}$ ). The standardized cross-covariance  
519 was calculated as

$$520 \quad Q_{ij}(u) = \sqrt{\frac{bT}{P_i P_j}} \hat{q}_{ij}(u),$$

521 with  $P_i, P_j$  being the mean firing rates. Only pairs of units with firing rates  $> 0.05$  Hz and  
522 significant standardized cross variance were considered. The Null hypothesis was rejected  
523 when  $|Q_{ij}(u)| > Z_\alpha$ . ( $Z_\alpha = \sqrt{2} \text{erf}^{-1}\left(\frac{1-\alpha}{N_{lags}}\right)$ ; two-tailed critical z value at level  $\alpha = 0.01$ ). The  
524 standardized mean cross-variance for one unit was calculated as

$$525 \quad Q_i(u) = \sqrt{\frac{1}{K} \sum_{j=1}^K Q_{ij}(u)},$$

526 ( $K = \text{number of units in 2. Region}$ ) and the mean for all unit pairs as:  $\langle Q_i(u) \rangle = \frac{1}{L^2} \sum_{i=1}^L Q_i(u)$ .

527 *Modulation index.* The modulation index (MI) of power, coherence, firing rate, and STP for light  
528 stimulation or DREADD manipulation was calculated as

$$529 \quad MI = \frac{Value_{stim} - Value_{pre}}{Value_{stim} + Value_{pre}}.$$

530 *Spike-LFP coupling.* Phase locking of spiking units to network oscillations was assessed using  
531 a previously described algorithm (Siapas et al., 2005). For this, the LFP signal was bandpass  
532 filtered (2-4 Hz (RR), 4-12 Hz (theta), 12-30 Hz (beta), 30-100 Hz (gamma)) using a third-order  
533 Butterworth filter. The instantaneous phase was extracted using the Hilbert transform on the  
534 filtered signal. The coupling between spikes and network oscillations was tested for  
535 significance using the Rayleigh test for non-uniformity. For analysis of baseline properties  
536 (Figure 1) only neurons that showed significant phase locking were considered for the analysis  
537 of the mean phase angle and the locking strength, which was calculated as mean resulting  
538 vector length (RVL). For paired comparison of RVLs (Figure 2, S1, S4) all units with a firing  
539 rate higher than 0.01 Hz during baseline (18 min) and after C21 injection (18 min, DREADD  
540 manipulation) or more than 10 spikes before (Pre) and during (Stim) light ramp pulses were  
541 considered. (<https://github.com/OpatzLab/HanganuOpatzToolbox/blob/master/Spikes-LFP>  
542 [analysis/getPPC\\_PLV.m](https://github.com/OpatzLab/HanganuOpatzToolbox/blob/master/Spikes-LFP))

543 *Spike-triggered power.* Spike-triggered power (STP) was calculated for the same time periods  
544 as RVL by taking the mean of the LFP power for 0.4 s long time windows centered on each  
545 spike.

546 *Phase-amplitude coupling.* Phase-amplitude coupling (PAC) between RR phase in OB and  
547 beta band amplitude in LEC and HP was calculated as previously described (Tort et al., 2010).  
548 Briefly, the LFP signals were bandpass filtered and the Hilbert transform was used to extract  
549 the phase and amplitude, respectively. Subsequently, the amplitude of the beta-filtered signal  
550 in LEC or HP was determined at each phase of the filtered OB signal. The phase was divided  
551 into 16 bins and the mean amplitude for each bin was calculated and normalized to the total  
552 number of bins. The normalized modulation index (MI) was calculated as the deviation between  
553 an empirical and uniform amplitude distribution. MI matrices were z-scored and the average  
554 was calculated for RR (2-3 Hz) – beta (12-30 Hz) coupling.

### 555 **Statistics**

556 Statistical analysis was performed in MATLAB environment or R Statistical Software. As none  
557 of the data sets were normally distributed, data were tested for significance using Wilcoxon  
558 rank-sum test (2 unrelated samples) or Wilcoxon sign-rank test (2 related samples). Data  
559 (except phase values) are presented as median (med) and interquartile range (iqr). Outlier  
560 removal was applied to paired data points if the distance of their difference from the 25<sup>th</sup> or 75<sup>th</sup>  
561 percentile exceeds 2.5 times the interquartile interval of their difference. Phase locking was  
562 tested for significance using the Rayleigh test for non-uniformity. Phase angles were compared  
563 using a circular non-parametric multi-sample test for equal medians. Differences in proportions  
564 were tested using Fisher's exact test. Nested data were analyzed with linear mixed-effects  
565 models (LMEM) using animals as a fixed effect. Significance levels \* $p < 0.05$ , \*\* $p < 0.01$  and  
566 \*\*\* $p < 0.001$  were considered. If not included in the text, values and corresponding test statistics  
567 of all presented data can be found in the supplementary material (Table S1-12).

568

569

570

571

572

573

574

575

576

577 **Additional Information**

578 **Acknowledgments**

579 We thank A. Marquardt, A. Dahlmann, P. Putthoff and K. Titze for excellent technical  
580 assistance, Dr. I. Braren from the Vector Facility of the UKE for the virus production as well as  
581 Drs. M. Chini, S.H. Bitzenhofer, and R.L. van den Brink for helpful discussions.

582 **Funding**

583 This work was funded by grants of the German Research Foundation (Ha4466/11-1 and SFB  
584 936 B5 to I.L.H.-O), European Research Council (ERC-2015-CoG 681577 to I.L.H.-O.),  
585 Horizon 2020 DEEPER (101016787 to I.L.H.-O.), and Landesforschungsförderung Hamburg  
586 (LFF73 and LFF76 to I.L. H.-O.).

587 **Author Contributions**

588 I.L.H.-O. and J.K.K conceived the study and designed the experiments. J.K.K carried out the  
589 experiments and analyzed the data. J.K.K, and I.L.H.-O. interpreted the data. J.K.K. and I.L.H.-  
590 O. wrote the article. All authors discussed and commented on the manuscript.

591 **Declaration of Interests**

592 The authors declare no competing interests.

593

594 **REFERENCES**

- 595 Ackman JB, Burbidge TJ, Crair MC. 2012. Retinal waves coordinate patterned activity  
596 throughout the developing visual system. *Nature* **490**:219–225.  
597 doi:10.1038/nature11529
- 598 Ahlbeck J, Song L, Chini M, Bitzenhofer SH, Hanganu-Opatz IL. 2018. Glutamatergic drive  
599 along the septo-temporal axis of hippocampus boosts prefrontal oscillations in the  
600 neonatal mouse. *eLife* **7**:e33158. doi:10.7554/eLife.33158
- 601 Basu J, Zaremba JD, Cheung SK, Hitti FL, Zemelman BV, Losonczy A, Siegelbaum SA.  
602 2016. Gating of hippocampal activity, plasticity, and memory by entorhinal cortex  
603 long-range inhibition. *Science* **351**. doi:10.1126/science.aaa5694
- 604 Bibbig A, Traub RD, Whittington MA. 2002. Long-range synchronization of gamma and beta  
605 oscillations and the plasticity of excitatory and inhibitory synapses: a network model. *J*  
606 *Neurophysiol* **88**:1634–1654. doi:10.1152/jn.2002.88.4.1634
- 607 Bitzenhofer SH, Ahlbeck J, Hanganu-Opatz IL. 2017a. Methodological Approach for  
608 Optogenetic Manipulation of Neonatal Neuronal Networks. *Front Cell Neurosci*  
609 **11**:239. doi:10.3389/fncel.2017.00239
- 610 Bitzenhofer SH, Ahlbeck J, Wolff A, Wiegert JS, Gee CE, Oertner TG, Hanganu-Opatz IL.  
611 2017b. Layer-specific optogenetic activation of pyramidal neurons causes beta-  
612 gamma entrainment of neonatal networks. *Nat Commun* **8**:14563.  
613 doi:10.1038/ncomms14563
- 614 Bitzenhofer SH, Pöppel JA, Chini M, Marquardt A, Hanganu-Opatz IL. 2021. A transient  
615 developmental increase in prefrontal activity alters network maturation and causes  
616 cognitive dysfunction in adult mice. *Neuron* **109**:1350-1364.e6.  
617 doi:10.1016/j.neuron.2021.02.011
- 618 Bitzenhofer SH, Pöppel JA, Hanganu-Opatz I. 2020. Gamma activity accelerates during  
619 prefrontal development. *eLife* **9**:e56795. doi:10.7554/eLife.56795

- 620 Brockmann MD, Pöschel B, Cichon N, Hanganu-Opatz IL. 2011. Coupled Oscillations  
621 Mediate Directed Interactions between Prefrontal Cortex and Hippocampus of the  
622 Neonatal Rat. *Neuron* **71**:332–347. doi:10.1016/j.neuron.2011.05.041
- 623 Che A, Babij R, Iannone AF, Fetcho RN, Ferrer M, Liston C, Fishell G, De Marco García NV.  
624 2018. Layer I Interneurons Sharpen Sensory Maps during Neonatal Development.  
625 *Neuron* **99**:98-116.e7. doi:10.1016/j.neuron.2018.06.002
- 626 Chen G, Rasch MJ, Wang R, Zhang X. 2015. Experience-dependent emergence of beta and  
627 gamma band oscillations in the primary visual cortex during the critical period. *Sci*  
628 *Rep* **5**:17847. doi:10.1038/srep17847
- 629 Chini M, Pöplau JA, Lindemann C, Carol-Perdiguer L, Hnida M, Oberländer V, Xu X,  
630 Ahlbeck J, Bitzenhofer SH, Mulert C, Hanganu-Opatz IL. 2020. Resolving and  
631 Rescuing Developmental Miswiring in a Mouse Model of Cognitive Impairment.  
632 *Neuron* **105**:60-74.e7. doi:10.1016/j.neuron.2019.09.042
- 633 Cichon NB, Denker M, Grün S, Hanganu-Opatz IL. 2014. Unsupervised classification of  
634 neocortical activity patterns in neonatal and pre-juvenile rodents. *Front Neural Circuits*  
635 **8**. doi:10.3389/fncir.2014.00050
- 636 Claudi F, Tyson AL, Petrucco L, Margrie TW, Portugues R, Branco T. 2020. Brainrender: a  
637 python-based software for visualizing anatomically registered data. *bioRxiv*  
638 2020.02.23.961748. doi:10.1101/2020.02.23.961748
- 639 David F, Courtiol E, Buonviso N, Fourcaud-Trocmé N. 2015. Competing Mechanisms of  
640 Gamma and Beta Oscillations in the Olfactory Bulb Based on Multimodal Inhibition of  
641 Mitral Cells Over a Respiratory Cycle. *eNeuro* **2**. doi:10.1523/ENEURO.0018-15.2015
- 642 Dietz SB, Markopoulos F, Murthy VN. 2011. Postnatal Development of Dendrodendritic  
643 Inhibition in the Mammalian Olfactory Bulb. *Front Cell Neurosci* **5**.  
644 doi:10.3389/fncel.2011.00010
- 645 Domnick N-K, Gretenkord S, De Feo V, Sedlacik J, Brockmann MD, Hanganu-Opatz IL.  
646 2015. Neonatal hypoxia–ischemia impairs juvenile recognition memory by disrupting  
647 the maturation of prefrontal–hippocampal networks. *Exp Neurol* **273**:202–214.  
648 doi:10.1016/j.expneurol.2015.08.017
- 649 Fletcher ML, Smith AM, Best AR, Wilson DA. 2005. High-Frequency Oscillations Are Not  
650 Necessary for Simple Olfactory Discriminations in Young Rats. *J Neurosci* **25**:792–  
651 798. doi:10.1523/JNEUROSCI.4673-04.2005
- 652 Fourcaud-Trocmé N, Courtiol E, Buonviso N. 2014. Two distinct olfactory bulb sublamina  
653 networks involved in gamma and beta oscillation generation: a CSD study in the  
654 anesthetized rat. *Front Neural Circuits* **8**. doi:10.3389/fncir.2014.00088
- 655 Gourévitch B, Kay LM, Martin C. 2010. Directional Coupling From the Olfactory Bulb to the  
656 Hippocampus During a Go/No-Go Odor Discrimination Task. *J Neurophysiol*  
657 **103**:2633–2641. doi:10.1152/jn.01075.2009
- 658 Gretenkord S, Kostka JK, Hartung H, Watznauer K, Fleck D, Minier-Toribio A, Spehr M,  
659 Hanganu-Opatz IL. 2019. Coordinated electrical activity in the olfactory bulb gates the  
660 oscillatory entrainment of entorhinal networks in neonatal mice. *PLOS Biol*  
661 **17**:e2006994. doi:10.1371/journal.pbio.2006994
- 662 Hanganu IL, Ben-Ari Y, Khazipov R. 2006. Retinal Waves Trigger Spindle Bursts in the  
663 Neonatal Rat Visual Cortex. *J Neurosci* **26**:6728–6736.  
664 doi:10.1523/JNEUROSCI.0752-06.2006
- 665 Hanganu-Opatz IL. 2010. Between molecules and experience: Role of early patterns of  
666 coordinated activity for the development of cortical maps and sensory abilities. *Brain*  
667 *Res Rev* **64**:160–176. doi:10.1016/j.brainresrev.2010.03.005

- 668 Hartung H, Brockmann MD, Pöschel B, Feo VD, Hanganu-Opatz IL. 2016a. Thalamic and  
669 Entorhinal Network Activity Differently Modulates the Functional Development of  
670 Prefrontal–Hippocampal Interactions. *J Neurosci* **36**:3676–3690.  
671 doi:10.1523/JNEUROSCI.3232-15.2016
- 672 Hartung H, Cichon N, De Feo V, Riemann S, Schildt S, Lindemann C, Mulert C, Gogos JA,  
673 Hanganu-Opatz IL. 2016b. From Shortage to Surge: A Developmental Switch in  
674 Hippocampal–Prefrontal Coupling in a Gene–Environment Model of Neuropsychiatric  
675 Disorders. *Cereb Cortex* **26**:4265–4281. doi:10.1093/cercor/bhw274
- 676 Hoy JL, Niell CM. 2015. Layer-Specific Refinement of Visual Cortex Function after Eye  
677 Opening in the Awake Mouse. *J Neurosci* **35**:3370–3383.
- 678 Igarashi KM, Ieki N, An M, Yamaguchi Y, Nagayama S, Kobayakawa K, Kobayakawa R,  
679 Tanifuji M, Sakano H, Chen WR, Mori K. 2012. Parallel Mitral and Tufted Cell  
680 Pathways Route Distinct Odor Information to Different Targets in the Olfactory Cortex.  
681 *J Neurosci* **32**:7970–7985. doi:10.1523/JNEUROSCI.0154-12.2012
- 682 Igarashi KM, Lu L, Colgin LL, Moser M-B, Moser EI. 2014. Coordination of entorhinal–  
683 hippocampal ensemble activity during associative learning. *Nature* **510**:143–147.  
684 doi:10.1038/nature13162
- 685 Iwasaki S, Sasaki T, Ikegaya Y. 2021. Hippocampal beta oscillations predict mouse object-  
686 location associative memory performance. *Hippocampus* **31**:503–511.  
687 doi:10.1002/hipo.23311
- 688 Kay LM. 2014. Chapter 9 - Circuit Oscillations in Odor Perception and Memory In: Barkai E,  
689 Wilson DA, editors. Progress in Brain Research, Odor Memory and Perception.  
690 Elsevier. pp. 223–251. doi:10.1016/B978-0-444-63350-7.00009-7
- 691 Khazipov R, Sirota A, Leinekugel X, Holmes GL, Ben-Ari Y, Buzsáki G. 2004. Early motor  
692 activity drives spindle bursts in the developing somatosensory cortex. *Nature*  
693 **432**:758–761. doi:10.1038/nature03132
- 694 Kopell N, Ermentrout GB, Whittington MA, Traub RD. 2000. Gamma rhythms and beta  
695 rhythms have different synchronization properties. *Proc Natl Acad Sci* **97**:1867–1872.  
696 doi:10.1073/pnas.97.4.1867
- 697 Kopell N, Whittington MA, Kramer MA. 2011. Neuronal assembly dynamics in the beta1  
698 frequency range permits short-term memory. *Proc Natl Acad Sci* **108**:3779–3784.  
699 doi:10.1073/pnas.1019676108
- 700 Kostka JK, Gretenkord S, Spehr M, Hanganu-Opatz IL. 2020. Bursting mitral cells time the  
701 oscillatory coupling between olfactory bulb and entorhinal networks in neonatal mice.  
702 *J Physiol* **598**:5753–5769. doi:10.1113/JP280131
- 703 Krüger H-S, Brockmann MD, Salamon J, Ittrich H, Hanganu-Opatz IL. 2012. Neonatal  
704 hippocampal lesion alters the functional maturation of the prefrontal cortex and the  
705 early cognitive development in pre-juvenile rats. *Neurobiol Learn Mem* **97**:470–481.  
706 doi:10.1016/j.nlm.2012.04.001
- 707 Leighton AH, Lohmann C. 2016. The Wiring of Developing Sensory Circuits—From  
708 Patterned Spontaneous Activity to Synaptic Plasticity Mechanisms. *Front Neural*  
709 *Circuits* **10**. doi:10.3389/fncir.2016.00071
- 710 Li Y, Xu J, Liu Y, Zhu J, Liu N, Zeng W, Huang N, Rasch MJ, Jiang H, Gu X, Li X, Luo M, Li  
711 C, Teng J, Chen J, Zeng S, Lin L, Zhang X. 2017. A distinct entorhinal cortex to  
712 hippocampal CA1 direct circuit for olfactory associative learning. *Nat Neurosci*  
713 **20**:559–570. doi:10.1038/nn.4517



- 714 Logan DW, Brunet LJ, Webb WR, Cutforth T, Ngai J, Stowers L. 2012. Learned recognition  
715 of maternal signature odors mediates the first suckling episode in mice. *Curr Biol CB*  
716 **22**:1998–2007. doi:10.1016/j.cub.2012.08.041
- 717 Luskin MB, Price JL. 1983. The topographic organization of associational fibers of the  
718 olfactory system in the rat, including centrifugal fibers to the olfactory bulb. *J Comp*  
719 *Neurol* **216**:264–291. doi:10.1002/cne.902160305
- 720 Martin C, Beshel J, Kay LM. 2007. An Olfacto-Hippocampal Network Is Dynamically Involved  
721 in Odor-Discrimination Learning. *J Neurophysiol* **98**:2196–2205.  
722 doi:10.1152/jn.00524.2007
- 723 Martin C, Gervais R, Messaoudi B, Ravel N. 2006. Learning-induced oscillatory activities  
724 correlated to odour recognition: a network activity. *Eur J Neurosci* **23**:1801–1810.  
725 doi:10.1111/j.1460-9568.2006.04711.x
- 726 Mizuno H, Luo W, Tarusawa E, Saito YM, Sato T, Yoshimura Y, Itohara S, Iwasato T. 2014.  
727 NMDAR-regulated dynamics of layer 4 neuronal dendrites during thalamocortical  
728 reorganization in neonates. *Neuron* **82**:365–379. doi:10.1016/j.neuron.2014.02.026
- 729 Neville KR, Haberly LB. 2003. Beta and Gamma Oscillations in the Olfactory System of the  
730 Urethane-Anesthetized Rat. *J Neurophysiol* **90**:3921–3930.  
731 doi:10.1152/jn.00475.2003
- 732 Nolte G, Bai O, Wheaton L, Mari Z, Vorbach S, Hallett M. 2004. Identifying true brain  
733 interaction from EEG data using the imaginary part of coherency. *Clin Neurophysiol*  
734 **115**:2292–2307. doi:10.1016/j.clinph.2004.04.029
- 735 Osinski BL, Kay LM. 2016. Granule cell excitability regulates gamma and beta oscillations in  
736 a model of the olfactory bulb dendrodendritic microcircuit. *J Neurophysiol* **116**:522–  
737 539. doi:10.1152/jn.00988.2015
- 738 Osinski BL, Kim A, Xiao W, Mehta NM, Kay LM. 2018. Pharmacological manipulation of the  
739 olfactory bulb modulates beta oscillations: testing model predictions. *J Neurophysiol*  
740 **120**:1090–1106. doi:10.1152/jn.00090.2018
- 741 Ramirez-Villegas JF, Besserve M, Murayama Y, Evrard HC, Oeltermann A, Logothetis NK.  
742 2021. Coupling of hippocampal theta and ripples with pontogeniculooccipital waves.  
743 *Nature* **589**:96–102. doi:10.1038/s41586-020-2914-4
- 744 Rangel LM, Rueckemann JW, Riviere PD, Keefe KR, Porter BS, Heimbuch IS, Budlong CH,  
745 Eichenbaum H. 2016. Rhythmic coordination of hippocampal neurons during  
746 associative memory processing. *eLife* **5**:e09849. doi:10.7554/eLife.09849
- 747 Ravel N, Chabaud P, Martin C, Gaveau V, Hugues E, Tallon-Baudry C, Bertrand O, Gervais  
748 R. 2003. Olfactory learning modifies the expression of odour-induced oscillatory  
749 responses in the gamma (60–90 Hz) and beta (15–40 Hz) bands in the rat olfactory  
750 bulb. *Eur J Neurosci* **17**:350–358. doi:https://doi.org/10.1046/j.1460-  
751 9568.2003.02445.x
- 752 Richter M, Murtaza N, Scharrenberg R, White SH, Johanns O, Walker S, Yuen RKC,  
753 Schwanke B, Bedürftig B, Henis M, Scharf S, Kraus V, Dörk R, Hellmann J,  
754 Lindenmaier Z, Ellegood J, Hartung H, Kwan V, Sedlacik J, Fiehler J, Schweizer M,  
755 Lerch JP, Hanganu-Opatz IL, Morellini F, Scherer SW, Singh KK, Calderon de Anda  
756 F. 2019. Altered TAOK2 activity causes autism-related neurodevelopmental and  
757 cognitive abnormalities through RhoA signaling. *Mol Psychiatry* **24**:1329–1350.  
758 doi:10.1038/s41380-018-0025-5
- 759 Rio-Bermudez CD, Blumberg MS. 2018. Active Sleep Promotes Functional Connectivity in  
760 Developing Sensorimotor Networks. *BioEssays* **40**:1700234.  
761 doi:10.1002/bies.201700234

- 762 Rossant C, Kadir SN, Goodman DFM, Schulman J, Hunter MLD, Saleem AB, Grosmark A,  
763 Belluscio M, Denfield GH, Ecker AS, Tolias AS, Solomon S, Buzsaki G, Carandini M,  
764 Harris KD. 2016. Spike sorting for large, dense electrode arrays. *Nat Neurosci*  
765 **19**:634–641. doi:10.1038/nn.4268
- 766 Roth BL. 2016. DREADDs for Neuroscientists. *Neuron* **89**:683–694.  
767 doi:10.1016/j.neuron.2016.01.040
- 768 Schwerdtfeger WK, Buhl EH, Germroth P. 1990. Disynaptic olfactory input to the  
769 hippocampus mediated by stellate cells in the entorhinal cortex. *J Comp Neurol*  
770 **292**:163–177. doi:https://doi.org/10.1002/cne.902920202
- 771 Shajarisales N, Janzing D, Shoelkopf B, Besserve M. 2015. Telling cause from effect in  
772 deterministic linear dynamical systems. *ArXiv150301299 Cs*.
- 773 Siapas AG, Lubenov EV, Wilson MA. 2005. Prefrontal Phase Locking to Hippocampal Theta  
774 Oscillations. *Neuron* **46**:141–151. doi:10.1016/j.neuron.2005.02.028
- 775 Spitzer B, Haegens S. 2017. Beyond the Status Quo: A Role for Beta Oscillations in  
776 Endogenous Content (Re)Activation. *eNeuro* **4**:ENEURO.0170-17.2017.  
777 doi:10.1523/ENEURO.0170-17.2017
- 778 Stachniak TJ, Ghosh A, Sternson SM. 2014. Chemogenetic synaptic silencing of neural  
779 circuits localizes a hypothalamus→midbrain pathway for feeding behavior. *Neuron*  
780 **82**:797–808. doi:10.1016/j.neuron.2014.04.008
- 781 Symanski CA, Bladon JH, Kullberg ET, Jadhav SP. 2021. Rhythmic coordination of  
782 hippocampal-prefrontal ensembles for odor-place associative memory and decision  
783 making. *bioRxiv* 2020.06.08.140939. doi:10.1101/2020.06.08.140939
- 784 Thompson KJ, Khajehali E, Bradley SJ, Navarrete JS, Huang XP, Slocum S, Jin J, Liu J,  
785 Xiong Y, Olsen RHJ, Diberto JF, Boyt KM, Pina MM, Pati D, Molloy C, Bundgaard C,  
786 Sexton PM, Kash TL, Krashes MJ, Christopoulos A, Roth BL, Tobin AB. 2018.  
787 DREADD Agonist 21 Is an Effective Agonist for Muscarinic-Based DREADDs in Vitro  
788 and in Vivo. *ACS Pharmacol Transl Sci* **1**:61–72. doi:10.1021/acsptsci.8b00012
- 789 Tort ABL, Komorowski R, Eichenbaum H, Kopell N. 2010. Measuring Phase-Amplitude  
790 Coupling Between Neuronal Oscillations of Different Frequencies. *J Neurophysiol*  
791 **104**:1195–1210. doi:10.1152/jn.00106.2010
- 792 Vanderwolf CH, Zibrowski EM. 2001. Piriform cortex  $\beta$ -waves: odor-specific sensitization  
793 following repeated olfactory stimulation. *Brain Res* **892**:301–308. doi:10.1016/S0006-  
794 8993(00)03263-7
- 795 Walz A, Omura M, Mombaerts P. 2006. Development and topography of the lateral olfactory  
796 tract in the mouse: Imaging by genetically encoded and injected fluorescent markers.  
797 *J Neurobiol* **66**:835–846. doi:https://doi.org/10.1002/neu.20266
- 798 Wang HC, Bergles DE. 2015. Spontaneous activity in the developing auditory system. *Cell*  
799 *Tissue Res* **361**:65–75. doi:10.1007/s00441-014-2007-5
- 800 Welker WI. 1964. Analysis of Sniffing of the Albino Rat. *Behaviour* **22**:223–244.
- 801 Wouterlood FG, Nederlof J. 1983. Terminations of olfactory afferents on layer II and III  
802 neurons in the entorhinal area: degeneration-Golgi-electron microscopic study in the  
803 rat. *Neurosci Lett* **36**:105–110. doi:10.1016/0304-3940(83)90250-1
- 804 Xu W, Wilson DA. 2012. Odor-evoked activity in the mouse lateral entorhinal cortex.  
805 *Neuroscience* **223**:12–20. doi:10.1016/j.neuroscience.2012.07.067
- 806 Xu X, Song L, Kringel R, Hanganu-Opatz IL. 2021. Developmental decrease of entorhinal  
807 gate disrupts prefrontal-hippocampal communication in immune-challenged DISC1  
808 knockdown mice. *Res Sq*. doi:10.21203/rs.3.rs-290304/v1

809 Yu Y, Burton SD, Tripathy SJ, Urban NN. 2015. Postnatal development attunes olfactory bulb  
810 mitral cells to high-frequency signaling. *J Neurophysiol* **114**:2830–2842.  
811 doi:10.1152/jn.00315.2015
